# Supplementary material for: Homo- and hetero-halogen interaction based molecular associations in wheel–axle topology derived Sn(iv) porphyrin complexes: an experimental and theoretical analysis
Source: Royal Society of Chemistry journal article supplement (doi:10.1039/d3ce00342f), 2023-01-01
Supplement: d3ce00342f1.pdf [file d3ce00342f1.pdf]

# Homo and Hetero-Halogen Interaction Based Molecular Associations in Wheel-Axle Topology Derived Sn(IV)-Porphyrin Complexes: An Experimental and Theoretical Analysis.

Rafia Siddiqui,<sup>a</sup> Jyoti Rani,<sup>b</sup> Akshita,<sup>b</sup> Swati Dhamija,<sup>a</sup> Kumar Shivam,<sup>a</sup> Deepika Kagra,<sup>b</sup> Purshotam Sharma,<sup>b, c</sup> P. Venugopalan<sup>b\*</sup> and Ranjan Patra<sup>a, d\*</sup>

<sup>a</sup>Amity Institute of Click Chemistry Research and Studies, Amity University, Noida, Uttar Pradesh, India. Email: [rpatra@amity.edu](mailto:rpatra@amity.edu)

<sup>b</sup>Department of Chemistry and Centre for Advanced Studies, Panjab University, Chandigarh-160014, India. Email: [venu@pu.ac.in](mailto:venu@pu.ac.in)

<sup>c</sup>Department of Chemistry and Biochemistry, University of Windsor, Ontario, N9B 3P4 Canada.

<sup>d</sup>Department of Chemistry, Pohang University of Science and Technology (POSTECH), Pohang 37673, South Korea.

## EXPERIMENTAL SECTION

**Materials:** Pyrrole, 4-iodobenzaldehyde, 4-fluorobenzoic acid, 2,5-difluorobenzoic acid, 3,4-difluorobenzoic acid, 2,4,6-trifluorobenzoic acid, 2,3,4,5-tetrafluorobenzoic acid, 2,3,4,6-tetrafluorobenzoic acid, 2,3,4,5,6-pentafluorobenzoic acid were obtained from TCI chemicals. Solvents like propionic acid, chloroform (CHCl<sub>3</sub>), dichloromethane (CH<sub>2</sub>Cl<sub>2</sub>), methanol, acetone, dimethylformamide (DMF), and hexane were obtained commercial sources and purified by standard procedures before use. Free-base porphyrins were prepared following the Adler method.<sup>1</sup> Sn(TIPP)(OH)<sub>2</sub> were prepared by literature methods.<sup>2</sup>

### Physical Measurements.

UV-vis spectra were recorded on a Perkin Elmer UV-Vis spectrometer. IR spectra were recorded on a Bruker Tensor 27 system spectrophotometer in ATR mode. Time-resolved fluorescence decays were collected with a commercial time-correlated single-photon counting (TCSPC) setup (Life Spec II, Edinburgh Instruments). The steady state fluorescence spectra of all the samples were recorded using Perkin Elmer LS 55 fluorescence spectrometer. The samples were prepared in dry dichloromethane and the concentration was adjusted so that the absorbance was less than 0.1. Absorption correction was done to normalize the data. Powder X-ray Diffraction (PXRD) was measured by a XEUSS SAXS/WAXS system by Xenocs, operated at 50 kV and 0.60 mA. The X-ray radiation was collimated with FOX2D mirror and two pairs of scatter-less slits from Xenocs.

The data were collected in the transmission mode geometry using Cu K $\alpha$  radiation (wavelength  $\lambda$  = 1.54 Å).

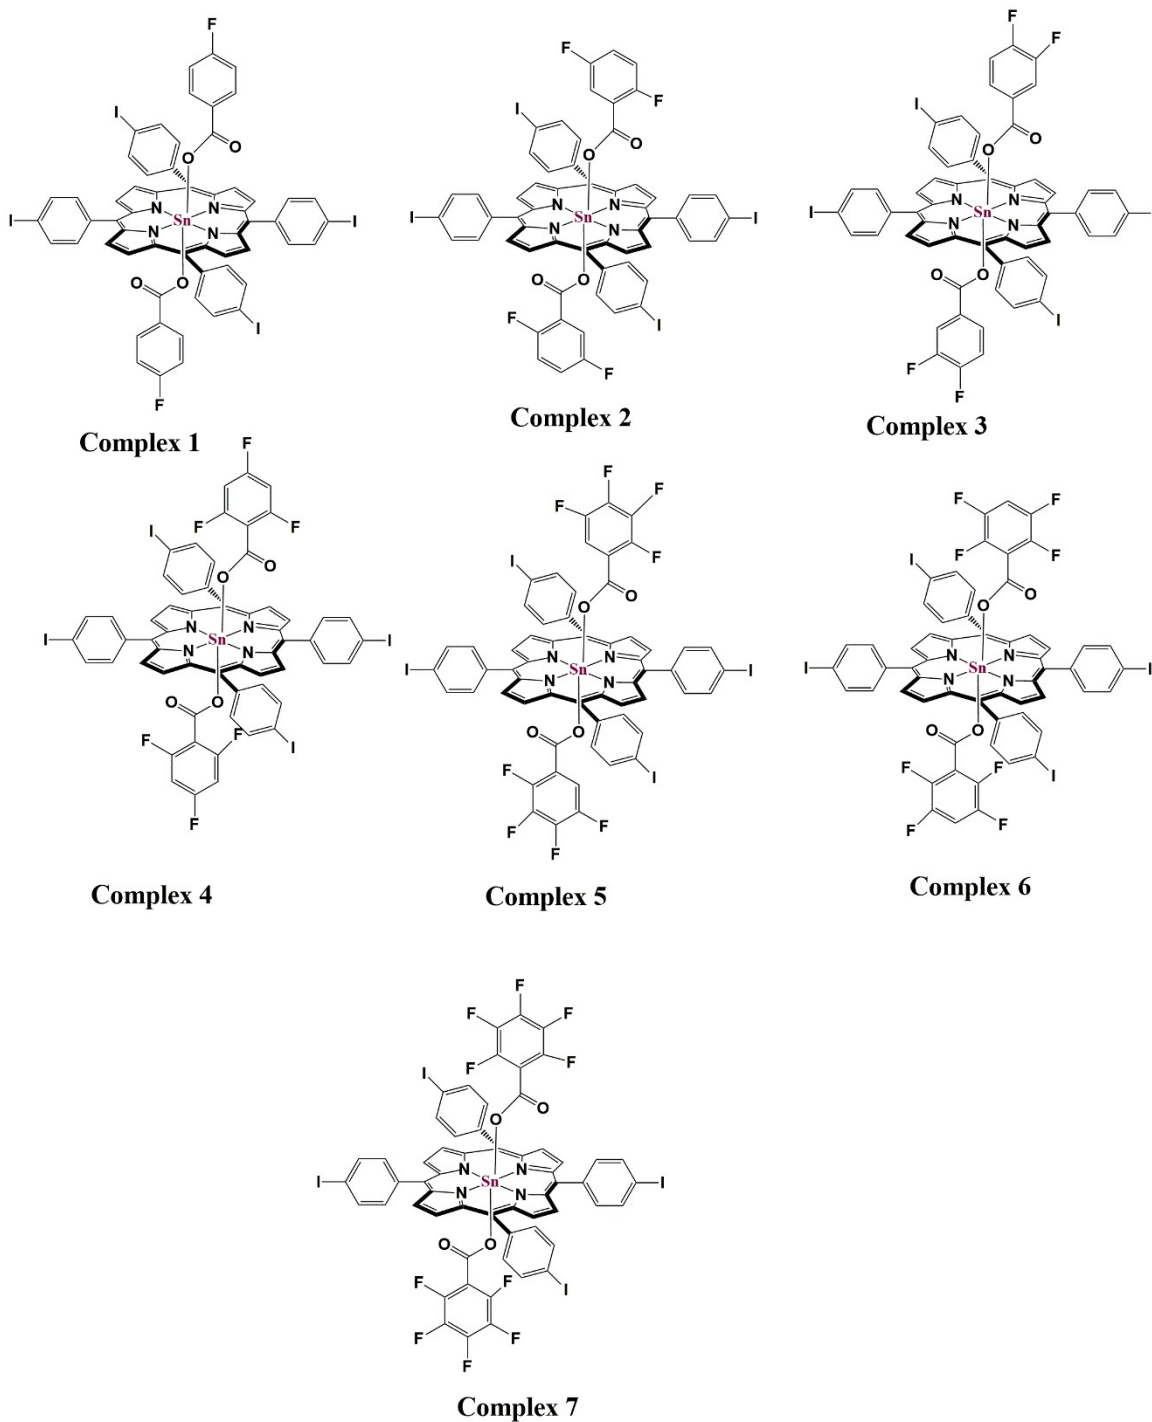

**Scheme S1:** Schematic illustration of the Sn(IV)-5,10,15,20-*meso*-tetrakis(4-iodophenyl)porphyrin scaffolds used in this study. Axial ligands (L) 4-fluoro benzoic acid (1), 2,5-difluoro benzoic acid (2), 3,4-

difluoro benzoic acid (**3**), 2,4,6-trifluoro benzoic acid (**4**), 2,3,4,5-tetrafluoro benzoic acid (**5**), 2,3,5,6-tetrafluoro benzoic acid (**6**), 2,3,4,5,6-pentafluoro benzoic acid (**7**).

### Synthesis of Complex-1

Trans-dihydroxo[5,10,15,20-tetrakis(4-iodophenyl)porphyrinato]tin(IV) (0.01 mmol, 12.8 mg) was dissolved in 5 ml of CHCl<sub>3</sub> in a vial. 3.5 mg of 4-fluorobenzoic acid (0.025 mmol) dissolved in 0.5 ml DMF and added to the vial. The resulting solution was heated for 1 h at 70 °C in bath reactor. After cooling, the mixture was left for slow evaporation at ambient conditions, dark red solid was precipitated out. Filtered the solid and washed with hexane. Yield (11.6 mg, 76%). X-ray quality crystals were obtained by slow diffusion of CH<sub>2</sub>Cl<sub>2</sub> solution of **1** into the cyclohexane. After 7 days, pink crystals of the complex were obtained. FT-IR (KBr, cm<sup>-1</sup>) 1720, 1448, 1227, 1038, 765, 751, 668, 565, 442. UV-Vis in DCM: λ<sub>max</sub>/nm (log e) 428(5.48), 552(2.98), 592(2.15).

### Synthesis of Complex-2

Trans-dihydroxo[5,10,15,20-tetrakis(4-iodophenyl)porphyrinato]tin(IV) (0.01 mmol, 12.8 mg) was dissolved in 5 ml of CHCl<sub>3</sub> in a vial. 3.9 mg of 2,5-difluorobenzoic acid (0.025 mmol) dissolved in 0.5 ml DMF and added to the vial. The resulting solution was heated for 1 h at 70 °C in bath reactor. After cooling, the mixture was left for slow evaporation at ambient conditions, dark red solid was precipitated out. Yield (11.6 mg, 74%). X-ray quality crystals were obtained slow evaporation of CHCl<sub>3</sub> solution of compound **2**. After 7 days, pink crystals of complex were obtained. FT-IR (KBr, cm<sup>-1</sup>) 1727, 1452, 1257, 1041, 775, 768, 662, 545, 436. UV-Vis in DCM: λ<sub>max</sub>/nm (log e) 427(5.46), 552(2.92), 592(2.12).

### Synthesis of Complex-3

Trans-dihydroxo[5,10,15,20-tetrakis(4-iodophenyl)porphyrinato]tin(IV) (0.01 mmol, 12.8 mg) was dissolved in 5 ml of CHCl<sub>3</sub> in a vial. 3.9 mg of 3,4-difluorobenzoic acid (0.025 mmol) dissolved in 0.5 ml DMF and added to the vial. The resulting solution was heated for 1 h at 70 °C in bath reactor. After cooling, the mixture was left for slow evaporation at ambient conditions, dark red solid was precipitated out. Yield (11.6 mg, 74%). X-ray quality crystals were obtained slow diffusion of CHCl<sub>3</sub> solution of compound **3** into the cyclohexane. After 10 days, pink crystals of complex were obtained. FT-IR (KBr, cm<sup>-1</sup>) 1732, 1432, 1242, 1025, 782, 758, 654, 536, 428. UV-Vis in DCM: λ<sub>max</sub>/nm (log e) 427(5.38), 554(2.98), 594(2.16).

### Synthesis of Complex-4

Trans-dihydroxo[5,10,15,20-tetrakis(4-iodophenyl)porphyrinato]tin(IV) (0.01 mmol, 12.8 mg) was dissolved in 5 ml of  $\text{CHCl}_3$  in a vial. 4.4 mg of 2,4,6-trifluorobenzoic acid (0.025 mmol) dissolved in 0.5 ml DMF and added to the vial. The resulting solution was heated for 1 h at 70 °C in bath reactor. After cooling, the mixture was left for slow evaporation at ambient conditions, dark red solid was precipitated out Yield (12 mg, 75%). X-ray quality crystals were obtained slow diffusion of  $\text{CH}_2\text{Cl}_2$  solution of compound **4** into the cyclohexane. After 8-9 days, pink crystals of complex were obtained. FT-IR (KBr,  $\text{cm}^{-1}$ ) 1727, 1428, 1198, 1040, 778, 752, 654, 569, 436. UV-Vis in DCM:  $\lambda_{\text{max}}/\text{nm}$  (log e) 426(5.36), 554(2.68), 584(2.22).

### Synthesis of Complex-5

Trans-dihydroxo[5,10,15,20-tetrakis(4-iodophenyl)porphyrinato]tin(IV) (0.01 mmol, 12.8 mg) was dissolved in 5 ml of  $\text{CHCl}_3$  in a vial. 4.8 mg of 2,3,4,5-tetrafluorobenzoic acid (0.025 mmol) dissolved in 0.5 ml DMF and added to the vial. The resulting solution was heated for 1 h at 70 °C in bath reactor. After cooling, the mixture was left for slow evaporation at ambient conditions, dark red solid was precipitated out Yield (12.7 mg, 78%). X-ray quality crystals were obtained slow evaporation of  $\text{CHCl}_3$  solution of compound **5**. After 7-8 days, pink crystals of complex were obtained. FT-IR (KBr,  $\text{cm}^{-1}$ ) 1738, 1434, 1212, 1042, 781, 756, 648, 584, 448. UV-Vis in DCM:  $\lambda_{\text{max}}/\text{nm}$  (log e) 425(5.38), 553(2.78), 598(2.24).

### Synthesis of Complex-6

Trans-dihydroxo[5,10,15,20-tetrakis(4-iodophenyl)porphyrinato]tin(IV) (0.01 mmol, 12.8 mg) was dissolved in 5 ml of  $\text{CHCl}_3$  in a vial. 4.8 mg of 2,3,5,6-tetrafluorobenzoic acid (0.025 mmol) dissolved in 0.5 ml DMF and added to the vial. The resulting solution was heated for 1 h at 70 °C in bath reactor. After cooling, the mixture was left for slow evaporation at ambient conditions, dark red solid was precipitated out Yield (11.7 mg, 72%). X-ray quality crystals were obtained slow diffusion of  $\text{CHCl}_3$  solution of compound **6** into the cyclohexane. After 8-10 days, pink crystals of complex were obtained. FT-IR (KBr,  $\text{cm}^{-1}$ ) 17636, 1435, 1223, 1107, 782, 754, 642, 572, 442. UV-Vis in DCM:  $\lambda_{\text{max}}/\text{nm}$  (log e) 424(5.38), 555(2.88), 598(2.46).

## Synthesis of Complex-7

Trans-dihydroxo[5,10,15,20-tetrakis(4-iodophenyl)porphyrinato]tin(IV) (0.01 mmol, 12.8 mg) was dissolved in 5 ml of CHCl<sub>3</sub> in a vial. 5.3 mg of 2,3,4,5,6-pentafluorobenzoic acid (0.025 mmol) dissolved in 0.5 ml DMF and added to the vial. The resulting solution was heated for 1 h at 70 °C in bath reactor. After cooling, the mixture was left for slow evaporation at ambient conditions, dark red solid was precipitated out Yield (12.5 mg, 75%). X-ray quality crystals were obtained slow evaporation of CHCl<sub>3</sub> solution of compound 7. After 10-12 days, pink crystals of complex were obtained. FT-IR (KBr, cm<sup>-1</sup>) 1742, 1448, 1224, 1048, 796, 764, 684, 576, 458. UV-Vis in DCM: λ<sub>max</sub>/nm (log ε) 424(5.46), 556(2.78), 598(2.25).

## X-ray Structure Determination:

Single-crystal X-ray diffraction data for complexes 1–7 were collected with a “SuperNova diffractometer” equipped with a HyPix3000 detector from Rigaku Oxford Diffraction. Data collection and reduction were performed with an inbuilt program suite (CrysAlisPro 1.171.39.33c (Rigaku OD, 2017)), and an absorption correction (multiscan method) was also done. Structures were solved by the direct method using SHELXS-97 and were refined on F<sup>2</sup> using the full-matrix least-squares technique using the SHELXL-2018/3<sup>3</sup> program package on the WINGX platform.<sup>4</sup> All non-hydrogen atoms were refined anisotropically except those of disordered solvent molecules, which were refined isotropically. Hydrogen atoms were fixed at their stereo-chemical positions and were riding with their respective non-hydrogen atoms with SHELXL default parameters. CCDC deposition numbers 2215489 (compound 1), 2215490 (compound 2), 2215488 (compound 3), 2215493 (compound 4), 2215491 (compound 5), 2215492 (compound 6) and 2215487 (compound 7) contain the supplementary crystallographic data for this paper. These data can be obtained free of charge via [www.ccdc.cam.ac.uk/data\\_request/cif](http://www.ccdc.cam.ac.uk/data_request/cif) or by emailing [data\\_request@ccdc.cam.ac.uk](mailto:data_request@ccdc.cam.ac.uk) or by contacting The Cambridge Crystallographic Data Centre, 12 Union Road, Cambridge CB2 1EZ, U.K.; fax: +44 1223 336033.

**Table S1.** Crystal data and data collection parameters

| CCDC No | Compound 1<br>2215489 | Compound 2<br>2215490 | Compound 3<br>2215488 | Compound 4<br>2215493 |
|---------|-----------------------|-----------------------|-----------------------|-----------------------|
| T, K    | 293(2)                | 293(2)                | 293(2)                | 293(2)                |

| Formula                                 | C64 H44 F2 I4 N4 O4 | C59 H31 Cl3 F4 I4 N4 | C65 H43 Cl3 F4 I4 N4 | C64 H40 F6 I4 N4 O4 |
|-----------------------------------------|---------------------|----------------------|----------------------|---------------------|
|                                         | Sn                  | O4 Sn                | O4 Sn                | Sn                  |
| Formula weight                          | 1597.32             | 1668.52              | 1752.67              | 1669.29             |
| Colour and Habit                        | Dark pink           | Dark pink            | Dark pink            | Dark pink           |
| Crystal system                          | Monoclinic          | Monoclinic           | Monoclinic           | Monoclinic          |
| Space group                             | $P2_1/c$            | $P2_1/c$             | $P2_1/c$             | $C2/c$              |
| $a$ , Å                                 | 14.2789(3)          | 12.5134(4)           | 12.5356(3)           | 21.2268(7)          |
| $b$ , Å                                 | 16.8821(4)          | 39.2235(8)           | 40.7661(8)           | 15.2917(5)          |
| $c$ , Å                                 | 12.1517(3)          | 12.3836(3)           | 12.4757(3)           | 18.6929(5)          |
| $\alpha$ , deg                          | 90                  | 90                   | 90                   | 90                  |
| $\beta$ , deg                           | 96.370(2)           | 103.376(3)           | 102.912(2)           | 94.748(3)           |
| $\gamma$ , deg                          | 90                  | 90                   | 90                   | 90                  |
| $V$ , Å <sup>3</sup>                    | 2911.18(12)         | 5913.2(3)            | 6214.2(2)            | 6046.8(3)           |
| Radiation ( $\lambda$ , Å)              | Mo K $\alpha$       | Mo K $\alpha$        | Mo K $\alpha$        | Mo K $\alpha$       |
|                                         | (0.71073)           | (0.71073)            | (0.71073)            | (0.71073)           |
| $Z$                                     | 2                   | 4                    | 4                    | 4                   |
| $d_{\text{calcd}}$ , g•cm <sup>-3</sup> | 1.822               | 1.874                | 1.73                 | 1.834               |
| $\mu$ , mm <sup>-1</sup>                | 2.618               | 2.718                | 2.591                | 2.534               |
| $F(000)$                                | 1536                | 3176                 | 3368                 | 3200                |
| No. of unique data                      | 5112                | 9634                 | 10049                | 5312                |
| No. of params.<br>refined               | 355                 | 725                  | 760                  | 373                 |
| GOF on F <sup>2</sup>                   | 1.059               | 1.070                | 1.022                | 1.073               |
| $R I^a [I > 2\sigma(I)]$                | 0.0450              | 0.0554               | 0.0569               | 0.0542              |
| $R I^a$ (all data)                      | 0.0559              | 0.0656               | 0.0682               | 0.0655              |
| wR2b (all data)                         | 0.1390              | 0.1791               | 0.1658               | 0.1709              |

|                  | Compound 5          | Compound 6          | Compound 7        |
|------------------|---------------------|---------------------|-------------------|
| <u>CCDC No</u>   | 2215491             | 2215492             | 2215487           |
| $T$ , K          | 293(2)              | 293(2)              | 293(2)            |
| Formula          | C58 H26 F8 I4 N4 O4 | C70 H50 F8 I4 N4 O4 | C58 H24 F10 I4 N4 |
|                  | Sn                  | Sn                  | O4 Sn             |
| Formula weight   | 1621.12             | 1789.43             | 1657.10           |
| Colour and Habit | Dark pink           | Dark pink           | Dark pink         |
| Crystal system   | Monoclinic          | Monoclinic          | Triclinic         |

|                                                               |                         |               |               |
|---------------------------------------------------------------|-------------------------|---------------|---------------|
| Space group                                                   | <i>P2<sub>1</sub>/c</i> | <i>C c</i>    | <i>P-1</i>    |
| <i>a</i> , Å                                                  | 10.6659(1)              | 15.5029(3)    | 8.1405(2)     |
| <i>b</i> , Å                                                  | 24.8734(4)              | 19.5370(4)    | 12.0603(3)    |
| <i>c</i> , Å                                                  | 30.8319(4)              | 22.8054(4)    | 14.9740(4)    |
| $\alpha$ , deg                                                | 90                      | 90            | 70.718(2)     |
| $\beta$ , deg                                                 | 92.536(1)               | 102.773(2)    | 85.026(2)     |
| $\gamma$ , deg                                                | 90                      | 90            | 83.285(2)     |
| <i>V</i> , Å <sup>3</sup>                                     | 8171.61(19)             | 6736.4(2)     | 1376.30(6)    |
| Radiation ( $\lambda$ , Å)                                    | Mo K $\alpha$           | Mo K $\alpha$ | Mo K $\alpha$ |
|                                                               | (0.71073)               | (0.71073)     | (0.71073)     |
| <i>Z</i>                                                      | 6                       | 4             | 1             |
| $d_{\text{calcd}}$ , g•cm <sup>-3</sup>                       | 1.977                   | 1.764         | 1.999         |
| $\mu$ , mm <sup>-1</sup>                                      | 2.815                   | 2.285         | 2.793         |
| <i>F</i> (000)                                                | 4608                    | 3456          | 784           |
| No. of unique data                                            | 14364                   | 9459          | 4835          |
| No. of params.<br>refined                                     | 1069                    | 815           | 367           |
| GOF on F <sup>2</sup>                                         | 1.078                   | 1.045         | 1.086         |
| <i>R</i> I <sup>a</sup> [ <i>I</i> > 2 $\sigma$ ( <i>I</i> )] | 0.0648                  | 0.0349        | 0.0424        |
| <i>R</i> I <sup>a</sup> (all data)                            | 0.0844                  | 0.0400        | 0.0496        |
| <i>wR</i> 2 <sup>b</sup> (all data)                           | 0.2147                  | 0.1019        | 0.1057        |

**Table S2.** Intermolecular weak interactions (other than halogen bond interactions) in compounds **1-7**

| Compound            | (X $\cdots$ Y/ $\pi$ ) | D(X $\cdots$ Y)<br>(Å) | Nature of<br>interaction | Interacting<br>partner |
|---------------------|------------------------|------------------------|--------------------------|------------------------|
| <b>1</b>            | C28-H28 $\cdots$ C21   | 2.857 (6)              | C-H $\cdots\pi$          | wheel-axle             |
|                     | C8-H8 $\cdots$ C28     | 2.803(7)               | C-H $\cdots\pi$          | wheel-axle             |
|                     | C13-H13 $\cdots$ C5    | 2.816(5)               | C-H $\cdots\pi$          | wheel-wheel            |
|                     | C13 $\cdots$ C23       | 3.275(9)               | $\pi\cdots\pi$           | wheel-axle             |
|                     | C25 $\cdots$ C25       | 3.337(9)               | $\pi\cdots\pi$           | axle-axle              |
|                     | C30-H30A $\cdots$ F1   | 2.595(6)               | HB                       | axle-solvent           |
|                     | C7-H7 $\cdots$ O2      | 2.661(5)               | HB                       | wheel-axle             |
| <b>2</b>            | C34-H34A $\cdots$ I2   | 2.926(1)               | HB                       | wheel-solvent          |
|                     | C29-H29 $\cdots$ C5    | 3.697(11)              | C-H $\cdots\pi$          | wheel-wheel            |
|                     | C29-H29 $\cdots$ C6    | 3.538(11)              | C-H $\cdots\pi$          | wheel-wheel            |
|                     | C56-H56 $\cdots$ C12   | 2.772(7)               | C-H $\cdots\pi$          | wheel-axle             |
|                     | C56-H56 $\cdots$ C13   | 2.726(7)               | C-H $\cdots\pi$          | wheel-axle             |
| C25-H25 $\cdots$ C9 | 2.781(7)               | C-H $\cdots\pi$        | wheel-wheel              |                        |

|           |                |           |              |                 |
|-----------|----------------|-----------|--------------|-----------------|
|           | C31-H31...C13  | 2.781(7)  | C-H... $\pi$ | wheel-wheel     |
|           | C8-H8...F1     | 2.496(9)  | HB           | wheel-axle      |
|           | C59-H59A...O4  | 2.374(8)  | HB           | axle-solvent    |
| <b>3</b>  | C23-H23...C1   | 2.773(7)  | C-H... $\pi$ | Wheel-wheel     |
|           | C23-H23...C20  | 2.788(7)  | C-H... $\pi$ | Wheel-wheel     |
|           | C25-H25...C8   | 2.764(8)  | C-H... $\pi$ | Wheel-wheel     |
|           | C18-H18...F2   | 2.515(10) | HB           | Wheel-axle      |
|           | C62-H62B...F3  | 2.374(12) | HB           | Wheel-axle      |
|           | C59-H59...O2   | 2.218(8)  | HB           | Axle-solvent    |
|           | C50-H50...O4   | 2.648(6)  | HB           | Axle-axle       |
|           | C60-H60B...C13 | 2.917(8)  | HB           | Solvent-solvent |
| <b>4</b>  | C33-H33A...I2  | 3.159(6)  | HB           | Wheel-solvent   |
|           | C19-H19...O1   | 2.565(4)  | HB           | Axle-wheel      |
|           | C34-H34A...F1  | 2.633(5)  | HB           | Axle-solvent    |
| <b>5A</b> | C43-H43...C25  | 2.845(13) | C-H... $\pi$ | Wheel-wheel     |
|           | C37-H37...C1   | 2.871(7)  | C-H... $\pi$ | Wheel-wheel     |
|           | C51-H51...C30  | 2.861(8)  | C-H... $\pi$ | Wheel-axle      |
|           | C7-H7...I4     | 3.071(1)  | HB           | Wheel-wheel     |
|           | C67-H67...I4   | 3.003(8)  | HB           | Wheel-wheel     |
|           | C29-H29...O2   | 2.557(9)  | HB           | Wheel-axle      |
| <b>5B</b> | C41-H41...C67  | 2.878 (8) | C-H... $\pi$ | Wheel-wheel     |
|           | C40-H40...F61  | 2.581(6)  | HB           | Wheel-axle      |
|           | C63-H63...F62  | 2.516(9)  | HB           | Wheel-axle      |
|           | C26-H26...F63  | 2.643(7)  | HB           | Wheel-axle      |
|           | C35-H35...F64  | 2.644(7)  | HB           | Wheel-axle      |
| <b>6</b>  | C35-H35...C7   | 2.771(8)  | C-H... $\pi$ | Wheel-wheel     |
|           | C25-H25...C17  | 2.848(9)  | C-H... $\pi$ | Wheel-wheel     |
|           | C60-H60A...C24 | 2.841(9)  | C-H... $\pi$ | Wheel-solvent   |
|           | C2-H2...F2     | 2.381(8)  | HB           | Wheel-axle      |
|           | C63-H63A...F1  | 2.589(6)  | HB           | Axle-solvent    |
|           | C12-H12...F6   | 2.631(7)  | HB           | Wheel-axle      |
| <b>7</b>  | C22-H22...C5   | 2.852(5)  | C-H... $\pi$ | Wheel-wheel     |
|           | C22-H22...C6   | 2.776(4)  | C-H... $\pi$ | Wheel-wheel     |
|           | C8-H8...C24    | 2.766(4)  | C-H... $\pi$ | Wheel-wheel     |
|           | C7-H7...C29    | 2.838(5)  | C-H... $\pi$ | Wheel-wheel     |

**Table S3.** Homo and hetero-halogen bond interactions in compound 1-7.

| Compound  | D(X...Y/ $\pi$ ) | $\theta_1(\text{C-X...Y})/\theta_2(\text{Y...X-C})$ | D(X...Y) (Å) | Type of interactions | Nature of Interaction | Interacting partner |
|-----------|------------------|-----------------------------------------------------|--------------|----------------------|-----------------------|---------------------|
| <b>1</b>  | I1...I2          | 167.3/105.5                                         | 3.817(1)     | Type II              | XB                    | Wheel-wheel         |
| <b>2</b>  | I2...I4          | 164.3/108.9                                         | 3.831(2)     | Type II              | XB                    | Wheel-wheel         |
|           | F2...C12         | 168.4/107.9                                         | 3.208(14)    | Type-II              | XB                    | Axle-solvent        |
| <b>5A</b> | I2...F8          | 161.5/121.7                                         | 3.317(9)     | Type II              | XB                    | Wheel-axle          |
|           | I4...F4          | 156.4/152.4                                         | 3.421(17)    | Type-I               | XB                    | Wheel-axle          |



|           |           |             |           |         |    |             |
|-----------|-----------|-------------|-----------|---------|----|-------------|
| <b>5B</b> | I62...F64 | 154.6/101.4 | 3.336(11) | Type-II | XB | Wheel-axle  |
| <b>6</b>  | I1...F8   | 143.8/104.4 | 3.265(6)  | Type II | XB | Wheel-axle  |
|           | I3...F4   | 148.8/101.4 | 3.229(5)  | Type-II | XB | Wheel-axle  |
| <b>7</b>  | I2...I2   | 133.9/133.9 | 3.886(1)  | Type I  | XB | Wheel-wheel |

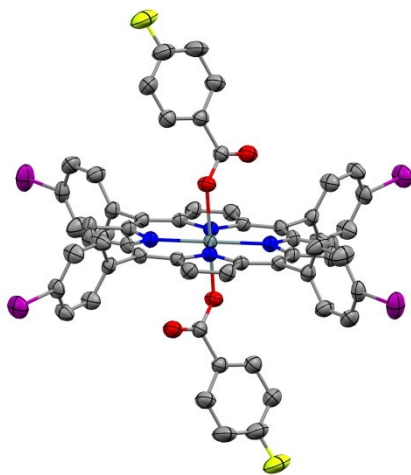

**Figure S1.** Perspective view of compound **1** showing 40% thermal ellipsoids for all non-hydrogen atoms at 293 K (H-atoms have been omitted for clarity).

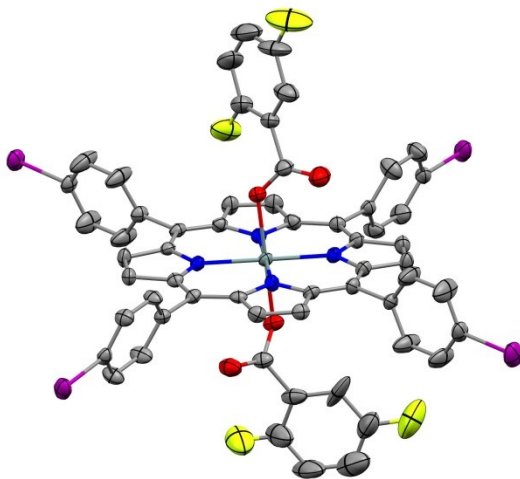

**Figure S2.** Perspective view of compound **2** showing 40% thermal ellipsoids for all non-hydrogen atoms at 293 K (H-atoms have been omitted for clarity).

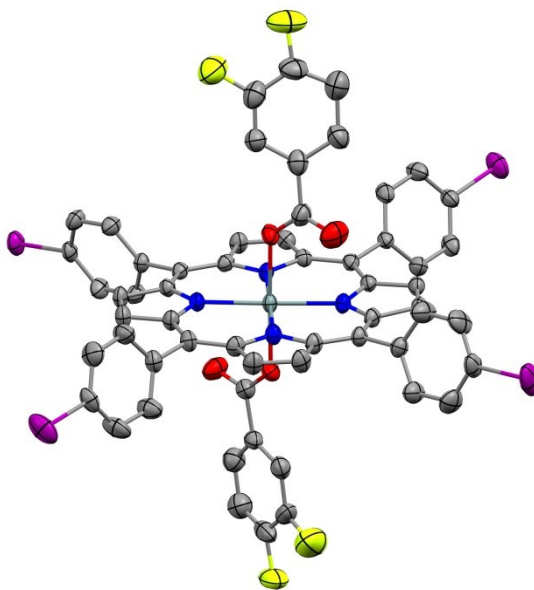

**Figure S3.** Perspective view of compound **3** showing 40% thermal ellipsoids for all non-hydrogen atoms at 293 K (H-atoms have been omitted for clarity).

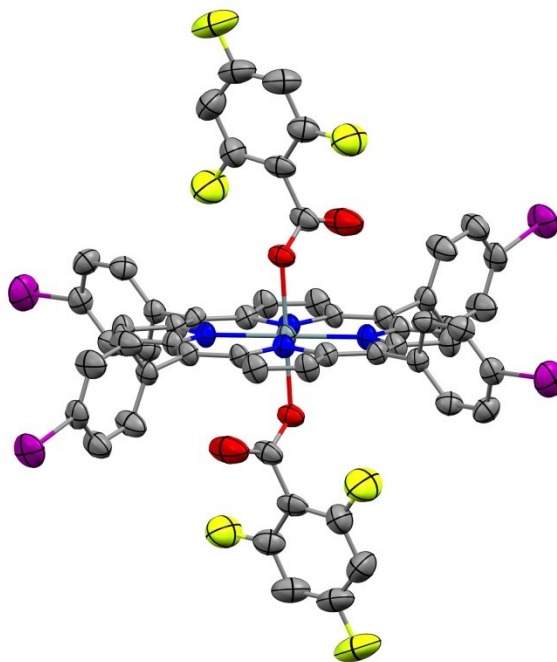

**Figure S4.** Perspective view of compound **4** showing 40% thermal ellipsoids for all non-hydrogen atoms at 293 K (H-atoms have been omitted for clarity).

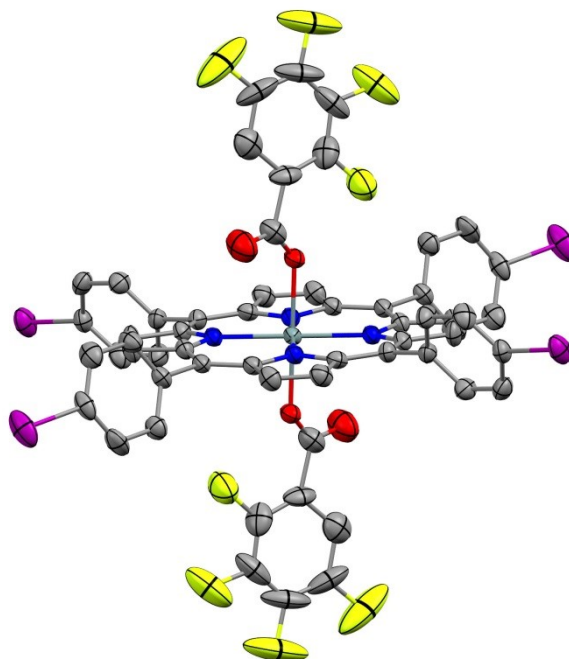

**Figure S5.** Perspective view of compound **5** showing 40% thermal ellipsoids for all non-hydrogen atoms at 293 K (H-atoms have been omitted for clarity).

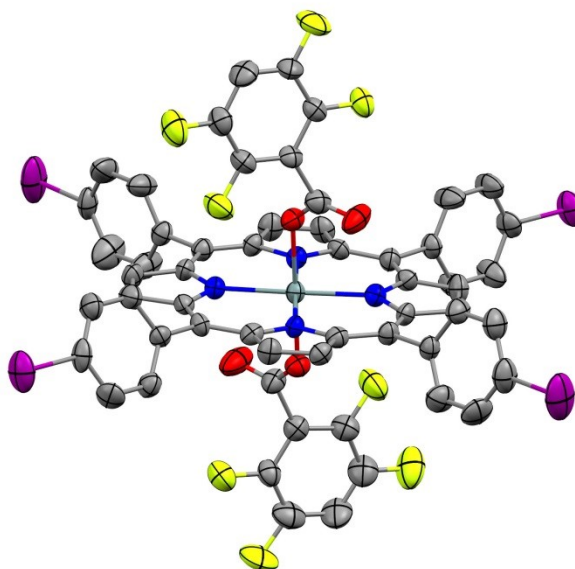

**Figure S6.** Perspective view of compound **6** showing 40% thermal ellipsoids for all non-hydrogen atoms at 293 K (H-atoms have been omitted for clarity).

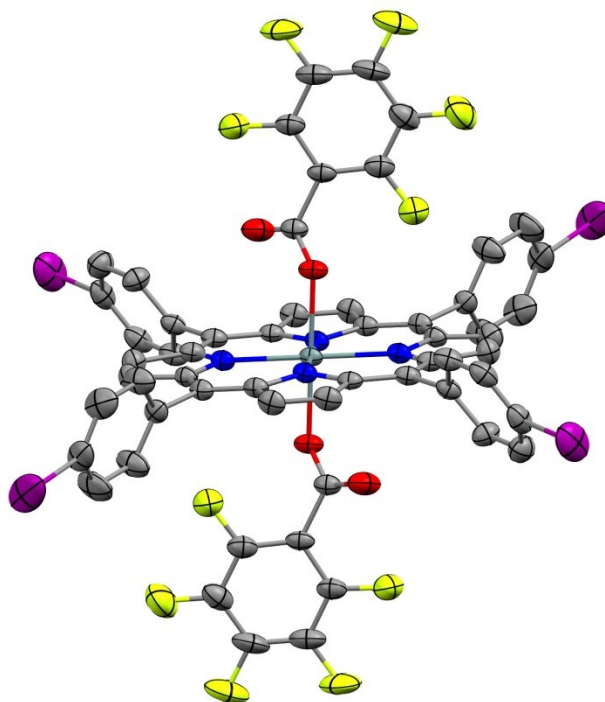

**Figure S7.** Perspective view of compound **7** showing 40% thermal ellipsoids for all non-hydrogen atoms at 293 K (H-atoms have been omitted for clarity).

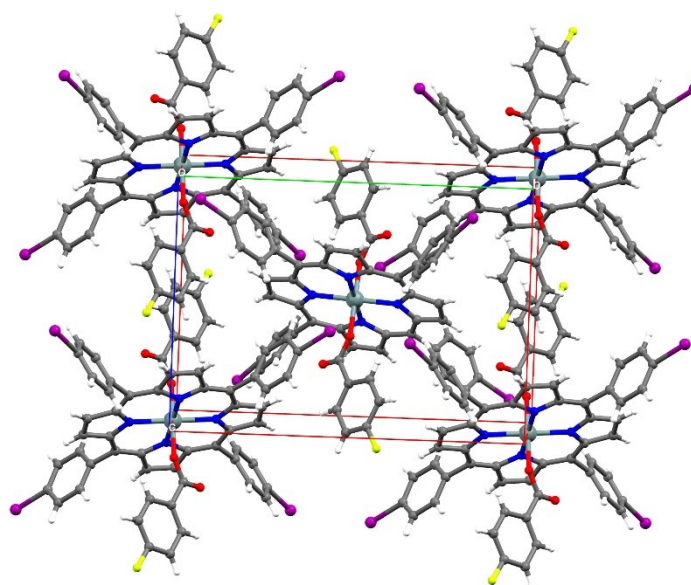

**Figure S8.** Packing diagram of compound **1** in the crystal lattice viewed along the a-axis

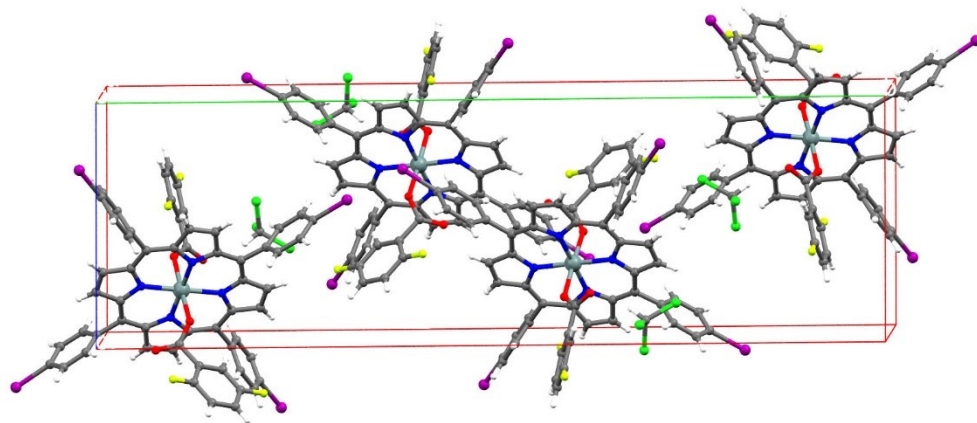

**Figure S9.** Packing diagram of compound **2** in the crystal lattice viewed along the a-axis

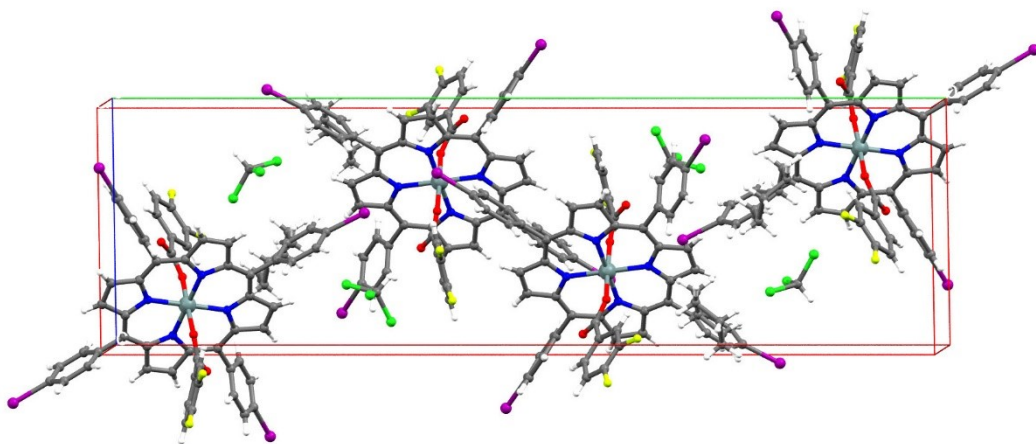

**Figure S10.** Packing diagram of compound **3** in the crystal lattice viewed along the a-axis

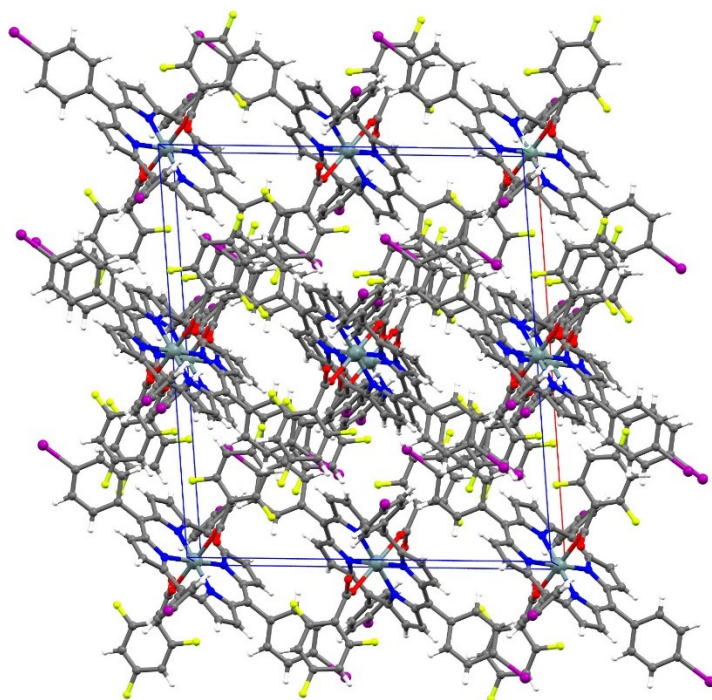

**Figure S11.** Packing diagram of compound **4** in the crystal lattice viewed along the a-axis

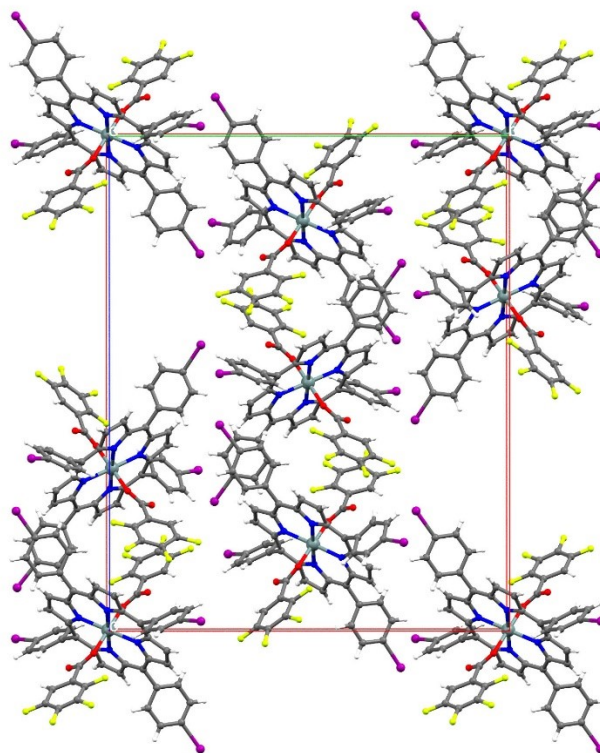

**Figure S12.** Packing diagram of compound **5** in the crystal lattice viewed along the a-axis

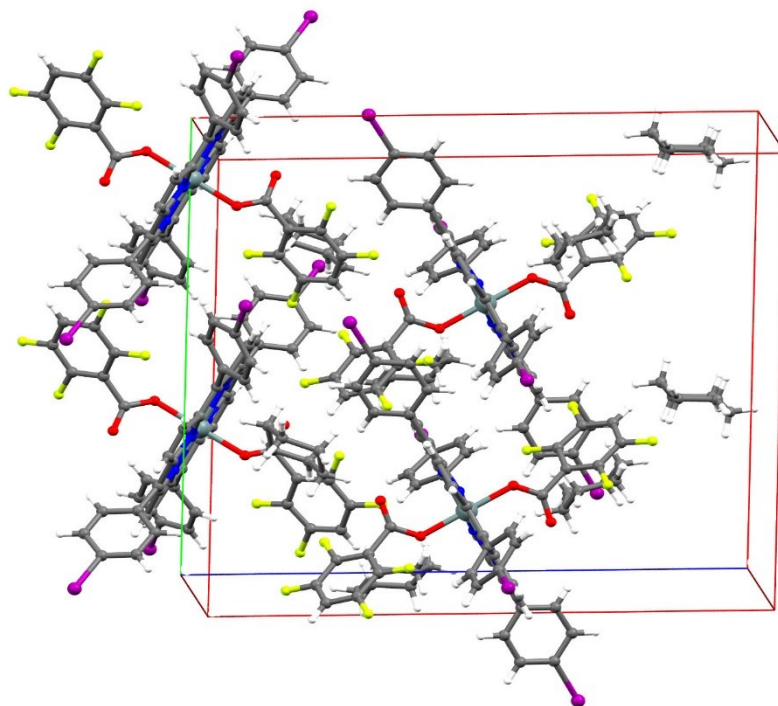

**Figure S13.** Packing diagram of compound **6** in the crystal lattice viewed along the a-axis

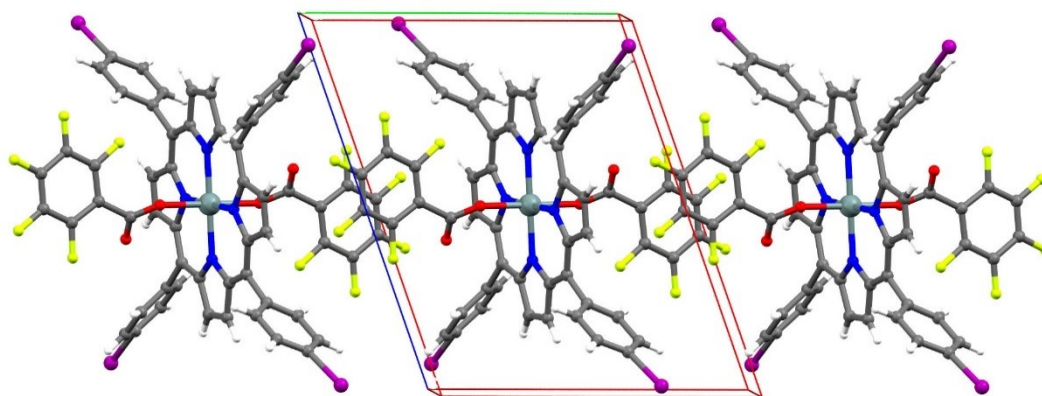

**Figure S14.** Packing diagram of compound **7** in the crystal lattice viewed along the a-axis

### **PXRD Analysis:**

The bulk purity of the sample was determined by PXRD analysis. Figure S1 depicts comparative experimental and simulated powder X-ray diffraction (PXRD) pattern of compound **2** and **3**. Both experimental and simulated PXRD showed distinctly similar pattern that confirms the bulk purity of the complex.

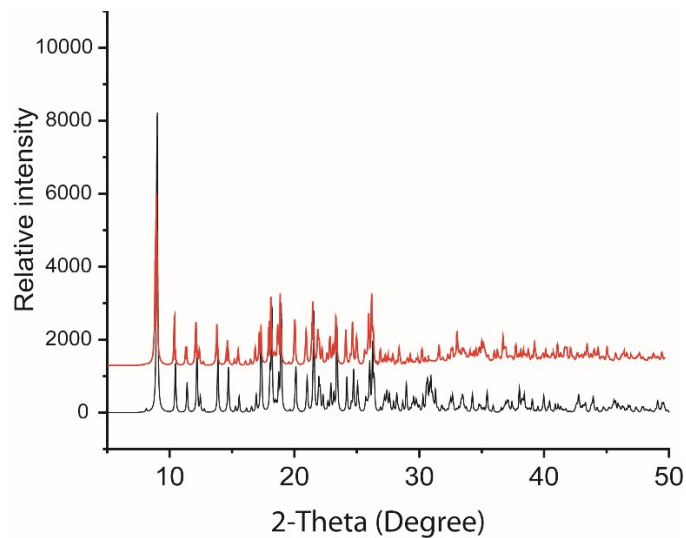

**Figure S15.** Overlapped experimental (red) and simulated (black) PXRD pattern of compound **1**. Simulated spectra (black) obtained from single crystal structure (Mercury software).

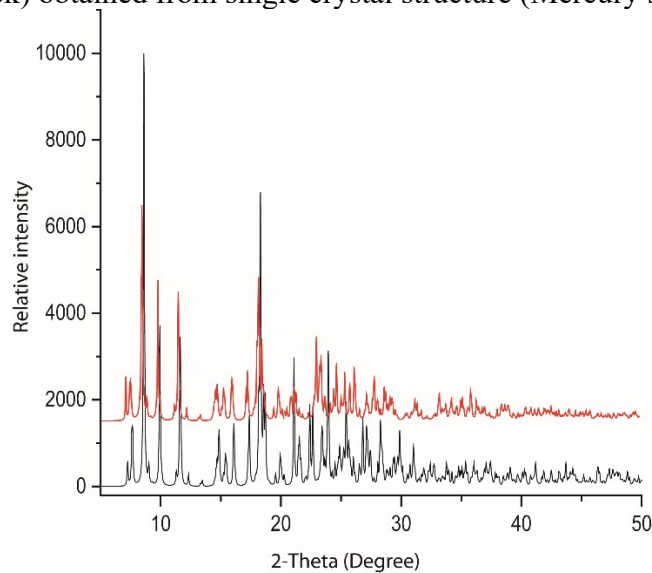

**Figure S16.** Overlapped experimental (red) and simulated (black) PXRD pattern of compound **2**. Simulated spectra (black) obtained from single crystal structure (Mercury software).



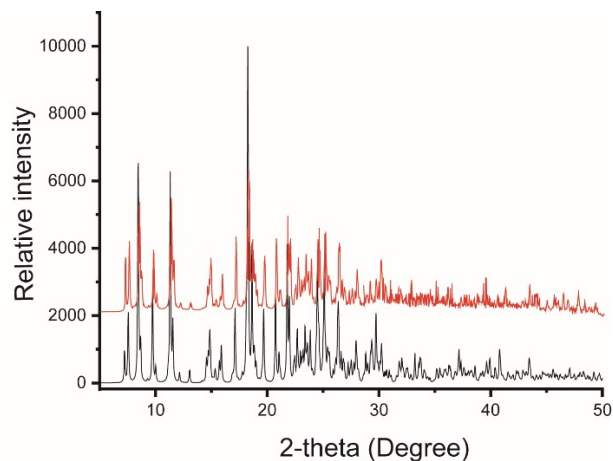

**Figure S17.** Overlapped experimental (red) and simulated (black) PXRD pattern of compound **3**. Simulated spectra (black) obtained from single crystal structure (Mercury software).

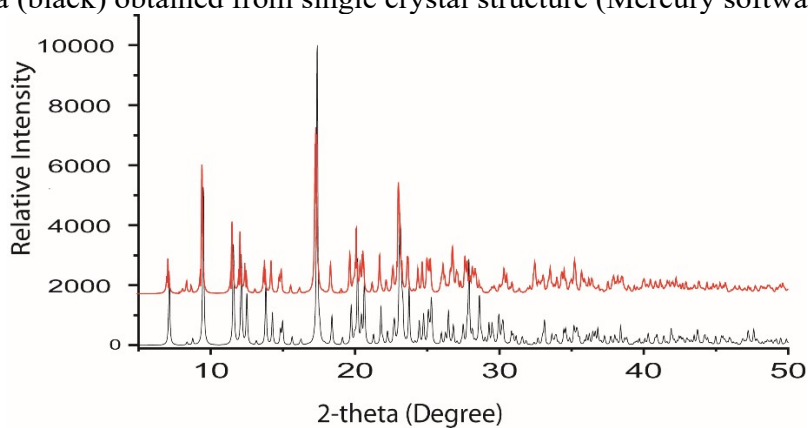

**Figure S18.** Overlapped experimental (red) and simulated (black) PXRD pattern of compound **4**. Simulated spectra (black) obtained from single crystal structure (Mercury software).

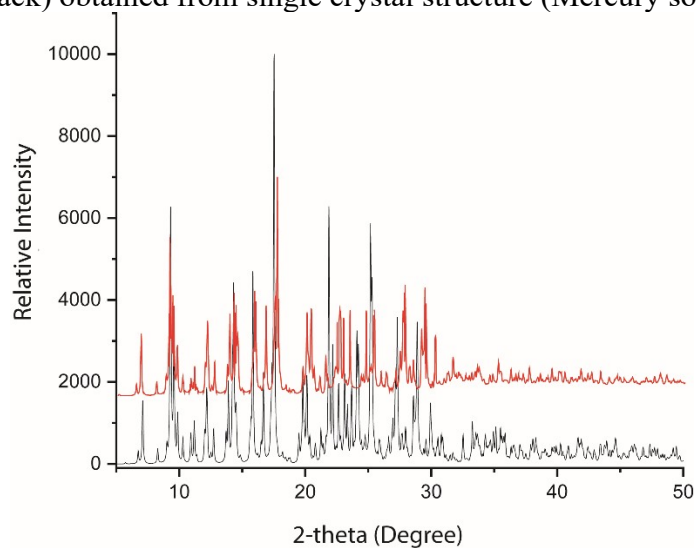

**Figure S19.** Overlapped experimental (red) and simulated (black) PXRD pattern of compound **5**. Simulated spectra (black) obtained from single crystal structure (Mercury software).

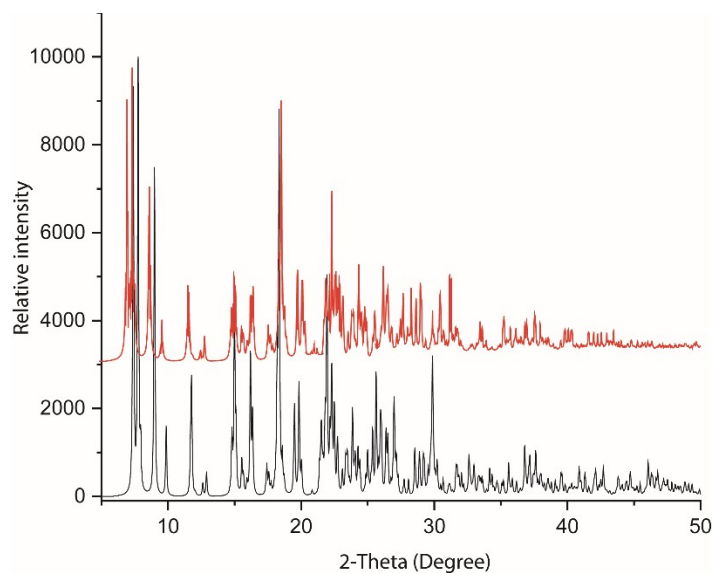

**Figure S20.** Overlapped experimental (red) and simulated (black) PXRD pattern of compound **6**. Simulated spectra (black) obtained from single crystal structure (Mercury software).

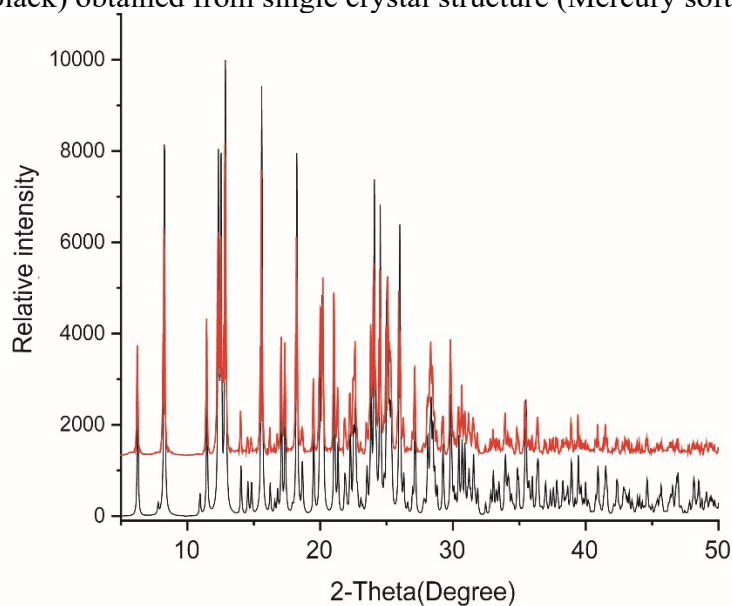

**Figure S21.** Overlapped experimental (red) and simulated (black) PXRD pattern of compound **7**. Simulated spectra (black) obtained from single crystal structure (Mercury software).

### Quantum chemical calculations.

We carried out DFT based geometry optimization on the monomeric and dimeric forms of compound **1**, **2**, **4**, **6** and **7**, starting from the coordinates extracted from X-ray structure. Specifically, we carried out unrestrained geometry optimizations in the gas phase, at the B3LYP level,<sup>5,6</sup> which was combined with the 6-31G\* basis set for light atoms (C, N, O, H and F) and a 19-electron effective core potential and associated double-zeta basis set (designated as LAN2DZ)

for heavy atoms (Sn and I). The optimized structures were further verified as minima using vibrational frequency calculations. The interaction energy of the fully-optimized dimer was calculated at the B3LYP level using the extended 6-311+G(d,p)<sup>7</sup> basis set for lighter atoms and a combination of LANL2DZ basis set and pseudopotential for heavier atoms. The counterpoise method was used to correct the interaction energy for basis set superposition error. All calculations were performed using Gaussian 09.<sup>8</sup>

In a previous reported study<sup>9</sup> where intramolecular hydrogen bonding has been studied through AIM analysis with electron density values ranging from 0.129 – 0.217 eÅ<sup>-3</sup> and laplacian of electron density ranges from 1.53 – 0.424 eÅ<sup>-5</sup>. In the present study the hetero-halogen bonds have  $\rho$  value of 0.029 eÅ<sup>-3</sup> and  $\nabla^2\rho$  value of 0.597 eÅ<sup>-5</sup> and the homo-halogen bonds have  $\rho$  value between 0.045 – 0.057 eÅ<sup>-3</sup> and  $\nabla^2\rho$  value between 0.460 – 0.597 eÅ<sup>-5</sup>. Unit conversions: For electron density, 1 a.u. = 6.7 eÅ<sup>-3</sup> For laplacian of electron density, 1 a.u. = 24.1 eÅ<sup>-5</sup>

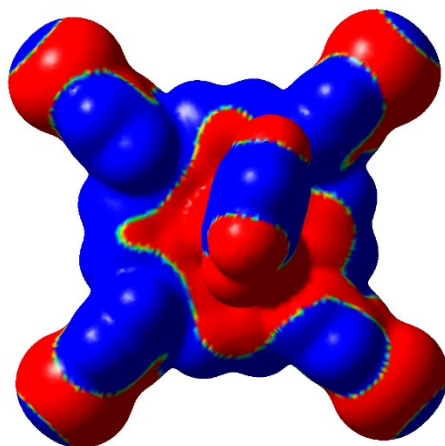

**Figure S22.** The electrostatic potential surfaces of the monomeric form of compound **6**. The theoretical charge density modeling drawn at surface value of 0.001 electrons/bohr<sup>3</sup> Blue, red and green colors represent electropositive, electronegative and neutral regions, respectively.

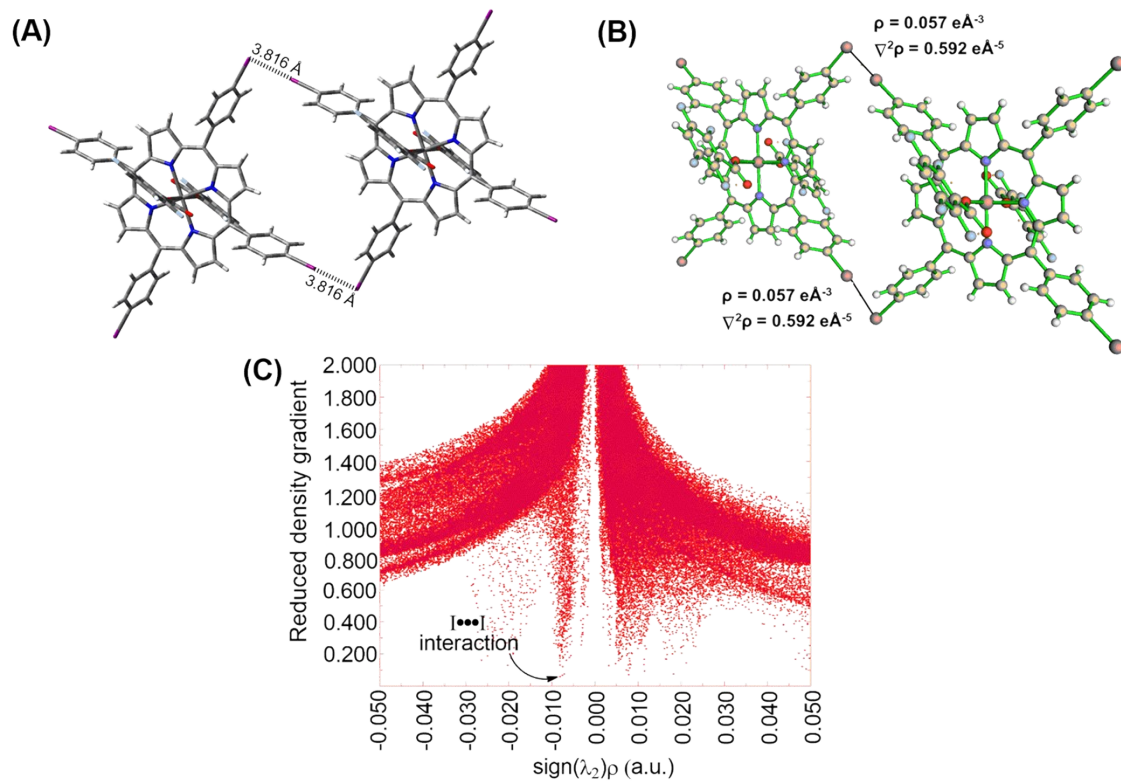

**Figure S23.** (A) Optimized structure of the dimeric form of compound **6**, depicting homo-halogen bonding (red). (B) Bond critical paths and bond critical points associated with hetero-halogen bonding. (C) NCI plot of reduced density gradient ( $S$ ) and  $\text{sign}(\lambda_2)\rho(r)$  for dimer of compound **6**.

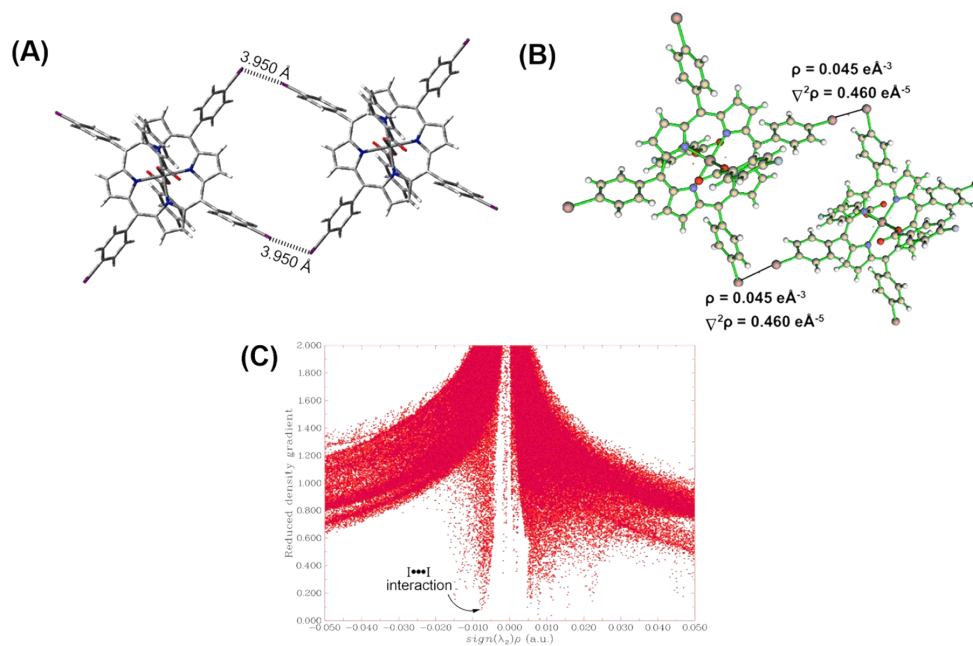

**Figure S24** (A) Optimized structure of the dimeric model compound **1**, depicting homo-halogen bonding (dashed black). (B) Bond critical paths and bond critical points associated with homo-halogen bonding. (C) NCI plot of reduced density gradient ( $S$ ) and  $\text{sign}(\lambda_2)\rho(r)$  for dimer of compound **1**.

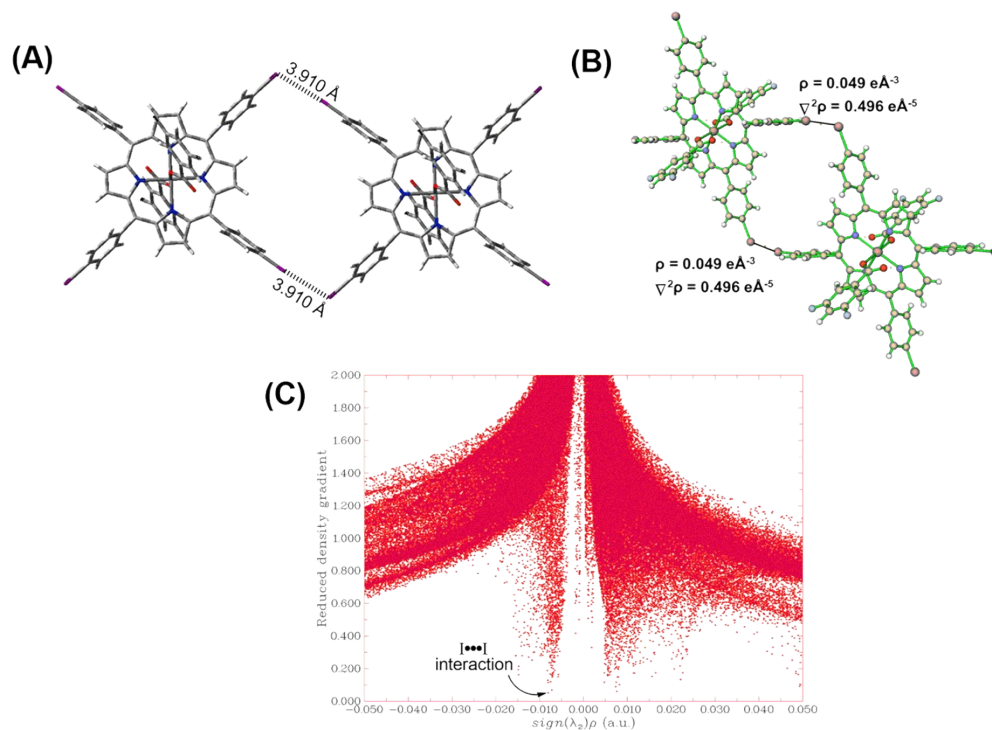

**Figure S25** (A) Optimized structure of the dimeric model compound **2**, depicting homo-halogen bonding (dashed black). (B) Bond critical paths and bond critical points associated with homo-halogen bonding. (C) NCI plot of reduced density gradient ( $S$ ) and  $\text{sign}(\lambda_2)\rho(r)$  for dimer of compound **2**.

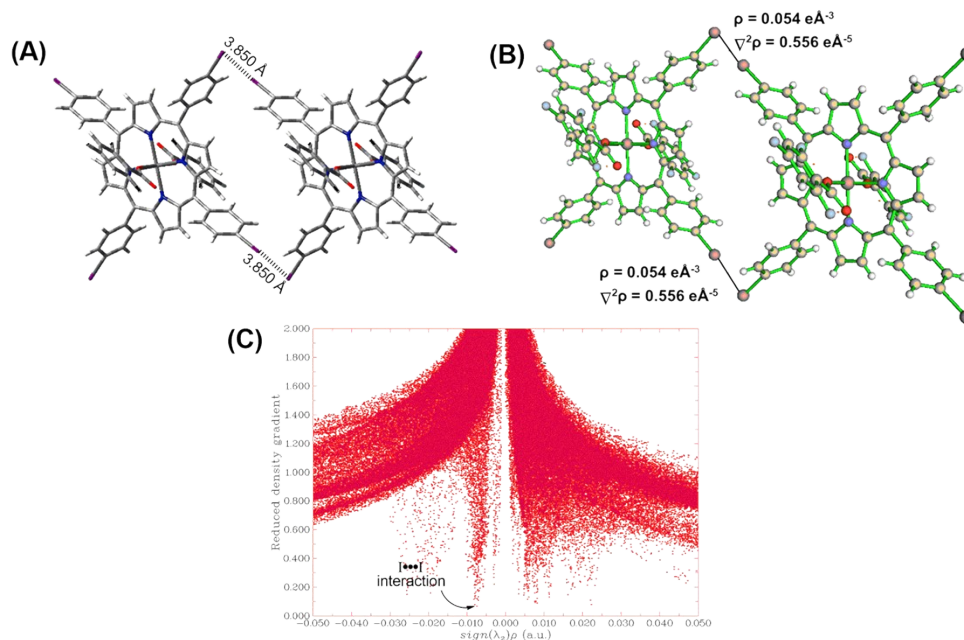

**Figure S26**(A) Optimized structure of the dimeric model compound **4**, depicting homo-halogen bonding (dashed black). (B) Bond critical paths and bond critical points associated with homo-halogen bonding. (C) NCI plot of reduced density gradient ( $S$ ) and  $\text{sign}(\lambda_2)\rho(r)$  for dimer of compound **4**.

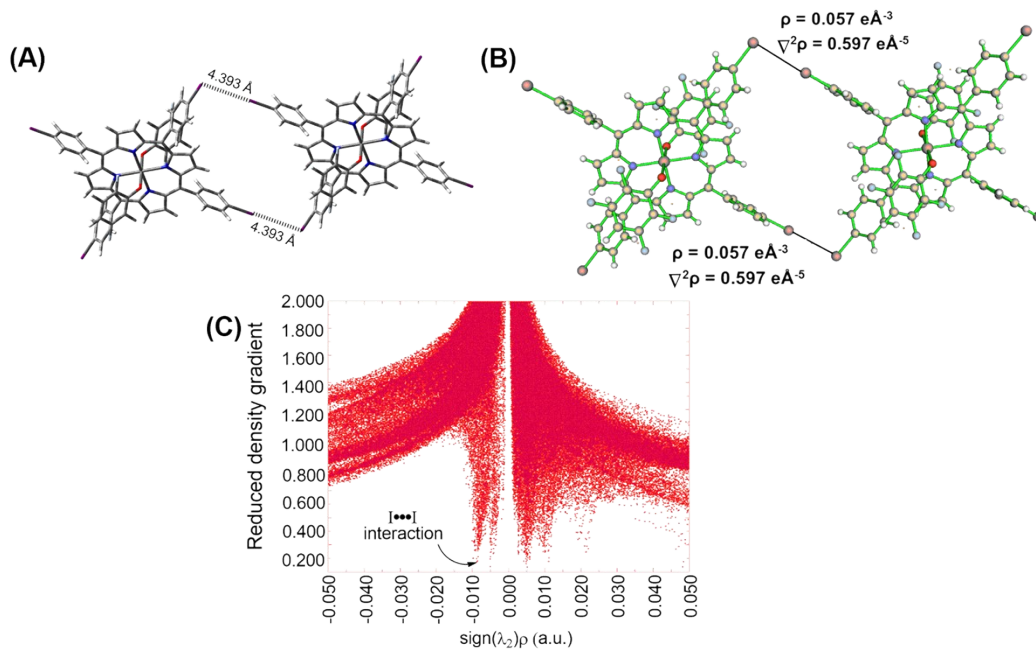

**Figure S27** (A) Optimized structure of the dimeric model compound **7**, depicting homo-halogen bonding (dashed black). (B) Bond critical paths and bond critical points associated with homo-halogen bonding. (C) NCI plot of reduced density gradient ( $S$ ) and  $\text{sign}(\lambda_2)\rho(r)$  for dimer of compound **7**.

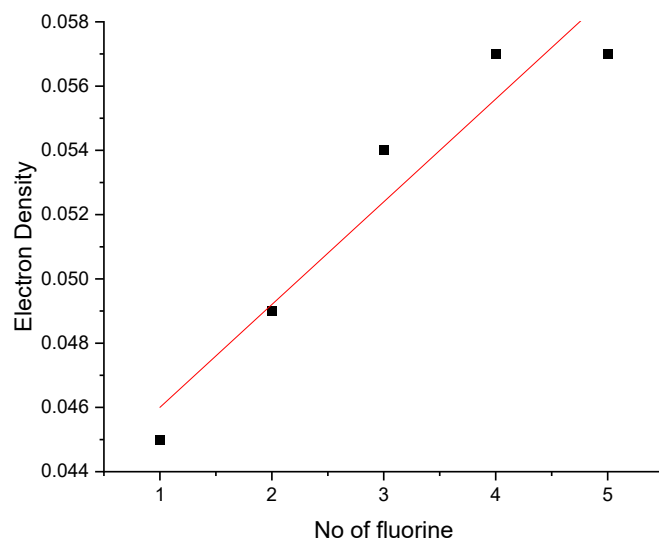

**Figure S28.** Plot of electron density ( $\rho^{\text{XBCEP}}$ ) halogen-bond critical point (XBCEP) with increasing number of fluorine atom.

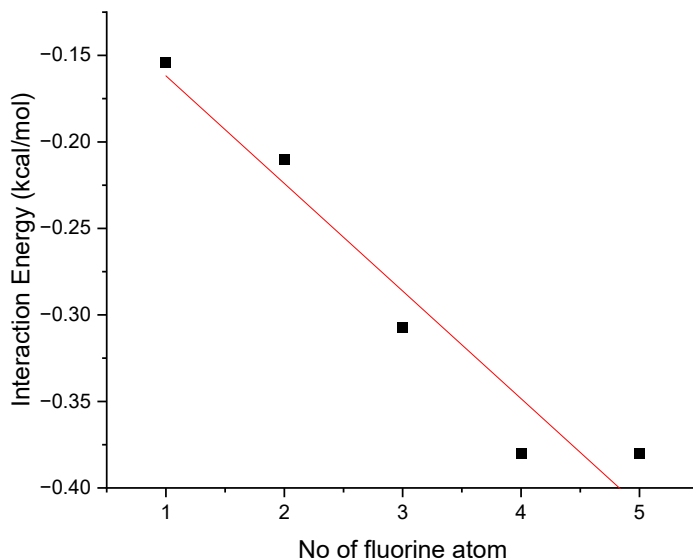

**Figure S29.** Plot of interaction energy (kcal/mol) with increasing number of fluorine atom.

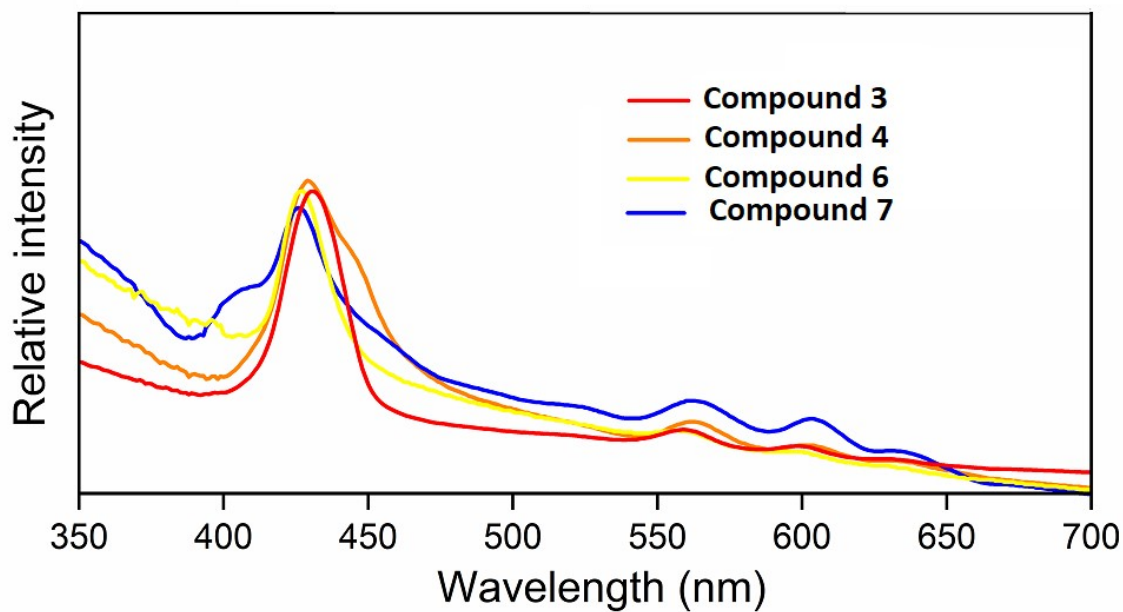

**Figure S30.** Solid state UV-vis spectra of compound 3, 4 6 and 7 at room temperature.

**Coordinates of optimize geometry.**

### Coordinates of monomer of compound 6

|    |              |              |              |
|----|--------------|--------------|--------------|
| Sn | 5.243789000  | 12.367312000 | 11.205930000 |
| F  | 2.684471000  | 9.553593000  | 9.221139000  |
| F  | 1.839528000  | 7.519791000  | 7.751006000  |
| F  | 4.769819000  | 8.787743000  | 4.316988000  |
| F  | 5.474896000  | 10.975887000 | 5.727070000  |
| F  | 7.774965000  | 15.260351000 | 13.313492000 |
| F  | 8.490234000  | 17.262893000 | 14.972675000 |
| F  | 5.698791000  | 15.498702000 | 18.286591000 |
| F  | 4.998671000  | 13.500067000 | 16.656322000 |
| I  | 9.959488000  | 4.845371000  | 15.346547000 |
| I  | 13.791966000 | 16.586522000 | 8.786994000  |
| I  | 0.602620000  | 19.825561000 | 6.848019000  |
| I  | -3.333286000 | 8.117037000  | 13.485638000 |
| N  | 5.856824000  | 14.088131000 | 10.217538000 |
| N  | 3.258485000  | 12.958892000 | 11.031561000 |
| N  | 4.634843000  | 10.608591000 | 12.168078000 |
| N  | 7.234808000  | 11.771043000 | 11.367400000 |
| O  | 5.070098000  | 11.235729000 | 9.447998000  |
| O  | 4.212098000  | 12.615041000 | 7.953399000  |
| O  | 5.411989000  | 13.488345000 | 12.979877000 |
| O  | 6.359100000  | 12.046514000 | 14.423321000 |
| C  | 7.148372000  | 14.461287000 | 9.970663000  |
| C  | 7.163018000  | 15.735100000 | 9.270069000  |
| H  | 7.903874000  | 16.205941000 | 8.963143000  |
| C  | 5.856567000  | 16.084812000 | 9.165537000  |
| H  | 5.547424000  | 16.872153000 | 8.778542000  |
| C  | 5.016412000  | 15.064981000 | 9.732683000  |
| C  | 3.589326000  | 15.043490000 | 9.770493000  |
| C  | 2.824706000  | 14.068594000 | 10.353209000 |
| C  | 1.397634000  | 14.027566000 | 10.302054000 |



|   |              |              |              |
|---|--------------|--------------|--------------|
| H | 0.843003000  | 14.662518000 | 9.910612000  |
| C | 1.005777000  | 12.913957000 | 10.915907000 |
| H | 0.126281000  | 12.626763000 | 11.013768000 |
| C | 2.178997000  | 12.224301000 | 11.402986000 |
| C | 2.168699000  | 10.946581000 | 12.050201000 |
| C | 3.314961000  | 10.260832000 | 12.430523000 |
| C | 3.356818000  | 9.045631000  | 13.162253000 |
| H | 2.617121000  | 8.586512000  | 13.491421000 |
| C | 4.645396000  | 8.658798000  | 13.304596000 |
| H | 4.945463000  | 7.887087000  | 13.731624000 |
| C | 5.465562000  | 9.659093000  | 12.675174000 |
| C | 6.877348000  | 9.631741000  | 12.581762000 |
| C | 7.697349000  | 10.620313000 | 12.014615000 |
| C | 9.124398000  | 10.657434000 | 11.970133000 |
| H | 9.687954000  | 9.993175000  | 12.294852000 |
| C | 9.526792000  | 11.786672000 | 11.391866000 |
| H | 10.405594000 | 12.066051000 | 11.262867000 |
| C | 8.334487000  | 12.493911000 | 11.002647000 |
| C | 8.281576000  | 13.759909000 | 10.326519000 |
| C | 2.901766000  | 16.190312000 | 9.083245000  |
| C | 2.834438000  | 16.260645000 | 7.684283000  |
| H | 3.234107000  | 15.594433000 | 7.172738000  |
| C | 2.212985000  | 17.257032000 | 7.081550000  |
| H | 2.192748000  | 17.290245000 | 6.151874000  |
| C | 1.600581000  | 18.247558000 | 7.806608000  |
| C | 1.677956000  | 18.210438000 | 9.154416000  |
| H | 1.314447000  | 18.898140000 | 9.663736000  |
| C | 2.279759000  | 17.176930000 | 9.754924000  |
| H | 2.267944000  | 17.137856000 | 10.682376000 |
| C | 0.874353000  | 10.340934000 | 12.350455000 |
| C | 0.516095000  | 9.147223000  | 11.776636000 |

|   |              |              |              |
|---|--------------|--------------|--------------|
| H | 1.099218000  | 8.742807000  | 11.173903000 |
| C | -0.681163000 | 8.523993000  | 12.065769000 |
| H | -0.907862000 | 7.730791000  | 11.636517000 |
| C | -1.519433000 | 9.063214000  | 12.966532000 |
| C | -1.235830000 | 10.280369000 | 13.589281000 |
| H | -1.830346000 | 10.673063000 | 14.187566000 |
| C | -0.025816000 | 10.872341000 | 13.271234000 |
| H | 0.199295000  | 11.669450000 | 13.693814000 |
| C | 7.572004000  | 8.518132000  | 13.244545000 |
| C | 7.813182000  | 7.365449000  | 12.577314000 |
| H | 7.584853000  | 7.314653000  | 11.676551000 |
| C | 8.378282000  | 6.275284000  | 13.175598000 |
| H | 8.436181000  | 5.464499000  | 12.721880000 |
| C | 8.867267000  | 6.398368000  | 14.478923000 |
| C | 8.654272000  | 7.541282000  | 15.103897000 |
| H | 8.941399000  | 7.619430000  | 15.984642000 |
| C | 8.029870000  | 8.619724000  | 14.527854000 |
| H | 7.921970000  | 9.410973000  | 15.003812000 |
| C | 9.630273000  | 14.418306000 | 9.950646000  |
| C | 10.274131000 | 14.047103000 | 8.847490000  |
| H | 9.911373000  | 13.388706000 | 8.300360000  |
| C | 11.497442000 | 14.644935000 | 8.504977000  |
| H | 11.947306000 | 14.394862000 | 7.730989000  |
| C | 12.007976000 | 15.586619000 | 9.323448000  |
| C | 11.347720000 | 15.979312000 | 10.451069000 |
| H | 11.718808000 | 16.624033000 | 11.009320000 |
| C | 10.119065000 | 15.410786000 | 10.762444000 |
| H | 9.639053000  | 15.696026000 | 11.505295000 |
| C | 4.509305000  | 11.548321000 | 8.331497000  |
| C | 4.129071000  | 10.337027000 | 7.526371000  |
| C | 3.161378000  | 9.407065000  | 8.020122000  |

|   |             |              |              |
|---|-------------|--------------|--------------|
| C | 2.759087000 | 8.371605000  | 7.243910000  |
| C | 3.283827000 | 8.119577000  | 6.002859000  |
| H | 3.014313000 | 7.386940000  | 5.495763000  |
| C | 4.226942000 | 9.000696000  | 5.549142000  |
| C | 4.604089000 | 10.110397000 | 6.265304000  |
| C | 6.021081000 | 13.154262000 | 14.047447000 |
| C | 6.368127000 | 14.353834000 | 14.923744000 |
| C | 7.233525000 | 15.344360000 | 14.525629000 |
| C | 7.645141000 | 16.342700000 | 15.397479000 |
| C | 7.140592000 | 16.438432000 | 16.645201000 |
| H | 7.418776000 | 17.114412000 | 17.223469000 |
| C | 6.171401000 | 15.477211000 | 17.056661000 |
| C | 5.850507000 | 14.439797000 | 16.235966000 |

**Coordinates for dimer model ((hetero-halogen interactions) compound 6**

|    |              |              |              |
|----|--------------|--------------|--------------|
| Sn | 5.243789000  | 12.367312000 | 11.205930000 |
| F  | 2.684471000  | 9.553593000  | 9.221139000  |
| F  | 1.839528000  | 7.519791000  | 7.751006000  |
| F  | 4.769819000  | 8.787743000  | 4.316988000  |
| F  | 5.474896000  | 10.975887000 | 5.727070000  |
| F  | 7.774965000  | 15.260351000 | 13.313492000 |
| F  | 8.490234000  | 17.262893000 | 14.972675000 |
| F  | 5.698791000  | 15.498702000 | 18.286591000 |
| F  | 4.998671000  | 13.500067000 | 16.656322000 |
| I  | 9.959488000  | 4.845371000  | 15.346547000 |
| I  | 13.791966000 | 16.586522000 | 8.786994000  |
| I  | 0.602620000  | 19.825561000 | 6.848019000  |
| I  | -3.333286000 | 8.117037000  | 13.485638000 |
| N  | 5.856824000  | 14.088131000 | 10.217538000 |
| N  | 3.258485000  | 12.958892000 | 11.031561000 |
| N  | 4.634843000  | 10.608591000 | 12.168078000 |

|   |              |              |              |
|---|--------------|--------------|--------------|
| N | 7.234808000  | 11.771043000 | 11.367400000 |
| O | 5.070098000  | 11.235729000 | 9.447998000  |
| O | 4.212098000  | 12.615041000 | 7.953399000  |
| O | 5.411989000  | 13.488345000 | 12.979877000 |
| O | 6.359100000  | 12.046514000 | 14.423321000 |
| C | 7.148372000  | 14.461287000 | 9.970663000  |
| C | 7.163018000  | 15.735100000 | 9.270069000  |
| H | 7.903874000  | 16.205941000 | 8.963143000  |
| C | 5.856567000  | 16.084812000 | 9.165537000  |
| H | 5.547424000  | 16.872153000 | 8.778542000  |
| C | 5.016412000  | 15.064981000 | 9.732683000  |
| C | 3.589326000  | 15.043490000 | 9.770493000  |
| C | 2.824706000  | 14.068594000 | 10.353209000 |
| C | 1.397634000  | 14.027566000 | 10.302054000 |
| H | 0.843003000  | 14.662518000 | 9.910612000  |
| C | 1.005777000  | 12.913957000 | 10.915907000 |
| H | 0.126281000  | 12.626763000 | 11.013768000 |
| C | 2.178997000  | 12.224301000 | 11.402986000 |
| C | 2.168699000  | 10.946581000 | 12.050201000 |
| C | 3.314961000  | 10.260832000 | 12.430523000 |
| C | 3.356818000  | 9.045631000  | 13.162253000 |
| H | 2.617121000  | 8.586512000  | 13.491421000 |
| C | 4.645396000  | 8.658798000  | 13.304596000 |
| H | 4.945463000  | 7.887087000  | 13.731624000 |
| C | 5.465562000  | 9.659093000  | 12.675174000 |
| C | 6.877348000  | 9.631741000  | 12.581762000 |
| C | 7.697349000  | 10.620313000 | 12.014615000 |
| C | 9.124398000  | 10.657434000 | 11.970133000 |
| H | 9.687954000  | 9.993175000  | 12.294852000 |
| C | 9.526792000  | 11.786672000 | 11.391866000 |
| H | 10.405594000 | 12.066051000 | 11.262867000 |

|   |              |              |              |
|---|--------------|--------------|--------------|
| C | 8.334487000  | 12.493911000 | 11.002647000 |
| C | 8.281576000  | 13.759909000 | 10.326519000 |
| C | 2.901766000  | 16.190312000 | 9.083245000  |
| C | 2.834438000  | 16.260645000 | 7.684283000  |
| H | 3.234107000  | 15.594433000 | 7.172738000  |
| C | 2.212985000  | 17.257032000 | 7.081550000  |
| H | 2.192748000  | 17.290245000 | 6.151874000  |
| C | 1.600581000  | 18.247558000 | 7.806608000  |
| C | 1.677956000  | 18.210438000 | 9.154416000  |
| H | 1.314447000  | 18.898140000 | 9.663736000  |
| C | 2.279759000  | 17.176930000 | 9.754924000  |
| H | 2.267944000  | 17.137856000 | 10.682376000 |
| C | 0.874353000  | 10.340934000 | 12.350455000 |
| C | 0.516095000  | 9.147223000  | 11.776636000 |
| H | 1.099218000  | 8.742807000  | 11.173903000 |
| C | -0.681163000 | 8.523993000  | 12.065769000 |
| H | -0.907862000 | 7.730791000  | 11.636517000 |
| C | -1.519433000 | 9.063214000  | 12.966532000 |
| C | -1.235830000 | 10.280369000 | 13.589281000 |
| H | -1.830346000 | 10.673063000 | 14.187566000 |
| C | -0.025816000 | 10.872341000 | 13.271234000 |
| H | 0.199295000  | 11.669450000 | 13.693814000 |
| C | 7.572004000  | 8.518132000  | 13.244545000 |
| C | 7.813182000  | 7.365449000  | 12.577314000 |
| H | 7.584853000  | 7.314653000  | 11.676551000 |
| C | 8.378282000  | 6.275284000  | 13.175598000 |
| H | 8.436181000  | 5.464499000  | 12.721880000 |
| C | 8.867267000  | 6.398368000  | 14.478923000 |
| C | 8.654272000  | 7.541282000  | 15.103897000 |
| H | 8.941399000  | 7.619430000  | 15.984642000 |
| C | 8.029870000  | 8.619724000  | 14.527854000 |

|    |              |              |              |
|----|--------------|--------------|--------------|
| H  | 7.921970000  | 9.410973000  | 15.003812000 |
| C  | 9.630273000  | 14.418306000 | 9.950646000  |
| C  | 10.274131000 | 14.047103000 | 8.847490000  |
| H  | 9.911373000  | 13.388706000 | 8.300360000  |
| C  | 11.497442000 | 14.644935000 | 8.504977000  |
| H  | 11.947306000 | 14.394862000 | 7.730989000  |
| C  | 12.007976000 | 15.586619000 | 9.323448000  |
| C  | 11.347720000 | 15.979312000 | 10.451069000 |
| H  | 11.718808000 | 16.624033000 | 11.009320000 |
| C  | 10.119065000 | 15.410786000 | 10.762444000 |
| H  | 9.639053000  | 15.696026000 | 11.505295000 |
| C  | 4.509305000  | 11.548321000 | 8.331497000  |
| C  | 4.129071000  | 10.337027000 | 7.526371000  |
| C  | 3.161378000  | 9.407065000  | 8.020122000  |
| C  | 2.759087000  | 8.371605000  | 7.243910000  |
| C  | 3.283827000  | 8.119577000  | 6.002859000  |
| H  | 3.014313000  | 7.386940000  | 5.495763000  |
| C  | 4.226942000  | 9.000696000  | 5.549142000  |
| C  | 4.604089000  | 10.110397000 | 6.265304000  |
| C  | 6.021081000  | 13.154262000 | 14.047447000 |
| C  | 6.368127000  | 14.353834000 | 14.923744000 |
| C  | 7.233525000  | 15.344360000 | 14.525629000 |
| C  | 7.645141000  | 16.342700000 | 15.397479000 |
| C  | 7.140592000  | 16.438432000 | 16.645201000 |
| H  | 7.418776000  | 17.114412000 | 17.223469000 |
| C  | 6.171401000  | 15.477211000 | 17.056661000 |
| C  | 5.850507000  | 14.439797000 | 16.235966000 |
| Sn | -2.507661000 | 22.135812000 | 11.205930000 |
| F  | -5.066979000 | 19.322093000 | 9.221139000  |
| F  | -5.911922000 | 17.288291000 | 7.751006000  |
| F  | -2.981631000 | 18.556243000 | 4.316988000  |

|   |               |              |              |
|---|---------------|--------------|--------------|
| F | -2.276554000  | 20.744387000 | 5.727070000  |
| F | 0.023515000   | 25.028851000 | 13.313492000 |
| F | 0.738784000   | 27.031393000 | 14.972675000 |
| F | -2.052659000  | 25.267202000 | 18.286591000 |
| F | -2.752779000  | 23.268567000 | 16.656322000 |
| I | 2.208038000   | 14.613871000 | 15.346547000 |
| I | 6.040516000   | 26.355022000 | 8.786994000  |
| I | -7.148830000  | 29.594061000 | 6.848019000  |
| I | -11.084736000 | 17.885537000 | 13.485638000 |
| N | -1.894626000  | 23.856631000 | 10.217538000 |
| N | -4.492965000  | 22.727392000 | 11.031561000 |
| N | -3.116607000  | 20.377091000 | 12.168078000 |
| N | -0.516642000  | 21.539543000 | 11.367400000 |
| O | -2.681352000  | 21.004229000 | 9.447998000  |
| O | -3.539352000  | 22.383541000 | 7.953399000  |
| O | -2.339461000  | 23.256845000 | 12.979877000 |
| O | -1.392350000  | 21.815014000 | 14.423321000 |
| C | -0.603078000  | 24.229787000 | 9.970663000  |
| C | -0.588432000  | 25.503600000 | 9.270069000  |
| H | 0.152424000   | 25.974441000 | 8.963143000  |
| C | -1.894883000  | 25.853312000 | 9.165537000  |
| H | -2.204026000  | 26.640653000 | 8.778542000  |
| C | -2.735038000  | 24.833481000 | 9.732683000  |
| C | -4.162124000  | 24.811990000 | 9.770493000  |
| C | -4.926744000  | 23.837094000 | 10.353209000 |
| C | -6.353816000  | 23.796066000 | 10.302054000 |
| H | -6.908447000  | 24.431018000 | 9.910612000  |
| C | -6.745673000  | 22.682457000 | 10.915907000 |
| H | -7.625169000  | 22.395263000 | 11.013768000 |
| C | -5.572453000  | 21.992801000 | 11.402986000 |
| C | -5.582751000  | 20.715081000 | 12.050201000 |

|   |              |              |              |
|---|--------------|--------------|--------------|
| C | -4.436489000 | 20.029332000 | 12.430523000 |
| C | -4.394632000 | 18.814131000 | 13.162253000 |
| H | -5.134329000 | 18.355012000 | 13.491421000 |
| C | -3.106054000 | 18.427298000 | 13.304596000 |
| H | -2.805987000 | 17.655587000 | 13.731624000 |
| C | -2.285888000 | 19.427593000 | 12.675174000 |
| C | -0.874102000 | 19.400241000 | 12.581762000 |
| C | -0.054101000 | 20.388813000 | 12.014615000 |
| C | 1.372948000  | 20.425933000 | 11.970133000 |
| H | 1.936504000  | 19.761675000 | 12.294852000 |
| C | 1.775342000  | 21.555172000 | 11.391866000 |
| H | 2.654144000  | 21.834551000 | 11.262867000 |
| C | 0.583037000  | 22.262411000 | 11.002647000 |
| C | 0.530126000  | 23.528409000 | 10.326519000 |
| C | -4.849684000 | 25.958812000 | 9.083245000  |
| C | -4.917012000 | 26.029145000 | 7.684283000  |
| H | -4.517343000 | 25.362933000 | 7.172738000  |
| C | -5.538465000 | 27.025532000 | 7.081550000  |
| H | -5.558702000 | 27.058745000 | 6.151874000  |
| C | -6.150869000 | 28.016058000 | 7.806608000  |
| C | -6.073494000 | 27.978938000 | 9.154416000  |
| H | -6.437003000 | 28.666640000 | 9.663736000  |
| C | -5.471691000 | 26.945430000 | 9.754924000  |
| H | -5.483506000 | 26.906356000 | 10.682376000 |
| C | -6.877097000 | 20.109434000 | 12.350455000 |
| C | -7.235355000 | 18.915723000 | 11.776636000 |
| H | -6.652232000 | 18.511308000 | 11.173903000 |
| C | -8.432613000 | 18.292493000 | 12.065769000 |
| H | -8.659312000 | 17.499291000 | 11.636517000 |
| C | -9.270883000 | 18.831714000 | 12.966532000 |
| C | -8.987280000 | 20.048869000 | 13.589281000 |



|   |              |              |              |
|---|--------------|--------------|--------------|
| H | -9.581796000 | 20.441563000 | 14.187566000 |
| C | -7.777266000 | 20.640840000 | 13.271234000 |
| H | -7.552155000 | 21.437950000 | 13.693814000 |
| C | -0.179446000 | 18.286632000 | 13.244545000 |
| C | 0.061732000  | 17.133949000 | 12.577314000 |
| H | -0.166597000 | 17.083153000 | 11.676551000 |
| C | 0.626832000  | 16.043784000 | 13.175598000 |
| H | 0.684731000  | 15.232999000 | 12.721880000 |
| C | 1.115817000  | 16.166867000 | 14.478923000 |
| C | 0.902822000  | 17.309782000 | 15.103897000 |
| H | 1.189949000  | 17.387930000 | 15.984642000 |
| C | 0.278420000  | 18.388224000 | 14.527854000 |
| H | 0.170520000  | 19.179473000 | 15.003812000 |
| C | 1.878823000  | 24.186806000 | 9.950646000  |
| C | 2.522681000  | 23.815603000 | 8.847490000  |
| H | 2.159923000  | 23.157206000 | 8.300360000  |
| C | 3.745992000  | 24.413435000 | 8.504977000  |
| H | 4.195856000  | 24.163362000 | 7.730989000  |
| C | 4.256526000  | 25.355119000 | 9.323448000  |
| C | 3.596270000  | 25.747812000 | 10.451069000 |
| H | 3.967358000  | 26.392533000 | 11.009320000 |
| C | 2.367615000  | 25.179286000 | 10.762444000 |
| H | 1.887603000  | 25.464526000 | 11.505295000 |
| C | -3.242145000 | 21.316821000 | 8.331497000  |
| C | -3.622379000 | 20.105527000 | 7.526371000  |
| C | -4.590072000 | 19.175566000 | 8.020122000  |
| C | -4.992363000 | 18.140105000 | 7.243910000  |
| C | -4.467623000 | 17.888077000 | 6.002859000  |
| H | -4.737137000 | 17.155440000 | 5.495763000  |
| C | -3.524508000 | 18.769196000 | 5.549142000  |
| C | -3.147361000 | 19.878898000 | 6.265304000  |

|   |              |              |              |
|---|--------------|--------------|--------------|
| C | -1.730369000 | 22.922762000 | 14.047447000 |
| C | -1.383323000 | 24.122334000 | 14.923744000 |
| C | -0.517925000 | 25.112860000 | 14.525629000 |
| C | -0.106309000 | 26.111200000 | 15.397479000 |
| C | -0.610858000 | 26.206932000 | 16.645201000 |
| H | -0.332674000 | 26.882912000 | 17.223469000 |
| C | -1.580049000 | 25.245711000 | 17.056661000 |
| C | -1.900943000 | 24.208297000 | 16.235966000 |

**Coordinates for dimer model of compound 1**

|    |              |              |             |
|----|--------------|--------------|-------------|
| Sn | 6.430375390  | 8.472659900  | 5.991171320 |
| I  | 2.111875390  | 1.069459900  | 1.165271320 |
| I  | -0.180524610 | 14.067359900 | 1.440971320 |
| N  | 4.732075390  | 8.170459900  | 4.819771320 |
| N  | 6.847475390  | 6.421459900  | 5.875271320 |
| O  | 7.649475390  | 8.619459900  | 4.318571320 |
| O  | 6.541675390  | 9.883959900  | 2.858471320 |
| C  | 3.878675390  | 9.158059900  | 4.393471320 |
| C  | 2.926175390  | 8.558659900  | 3.511871320 |
| H  | 2.231175390  | 9.000359900  | 3.078871320 |
| C  | 3.204975390  | 7.252059900  | 3.418871320 |
| H  | 2.732075390  | 6.627259900  | 2.918271320 |
| C  | 4.353475390  | 6.990359900  | 4.220771320 |
| C  | 5.012275390  | 5.771459900  | 4.356071320 |
| C  | 6.178875390  | 5.516559900  | 5.110771320 |
| C  | 6.870775390  | 4.258859900  | 5.206271320 |
| H  | 6.642575390  | 3.467759900  | 4.775371320 |
| C  | 7.915375390  | 4.447959900  | 6.043171320 |
| H  | 8.525975390  | 3.795859900  | 6.303571320 |
| C  | 7.926375390  | 5.805259900  | 6.456171320 |
| C  | 3.979075390  | 10.525459900 | 4.696571320 |
| C  | 4.374575390  | 4.604959900  | 3.621771320 |

|   |              |              |              |
|---|--------------|--------------|--------------|
| C | 4.878375390  | 4.138959900  | 2.434671320  |
| H | 5.662875390  | 4.506859900  | 2.098671320  |
| C | 4.241375390  | 3.127759900  | 1.719671320  |
| H | 4.584875390  | 2.831659900  | 0.907471320  |
| C | 3.098475390  | 2.575659900  | 2.236571320  |
| C | 2.600075390  | 3.021359900  | 3.414071320  |
| H | 1.821475390  | 2.646259900  | 3.758171320  |
| C | 3.247375390  | 4.037659900  | 4.113271320  |
| H | 2.901675390  | 4.330259900  | 4.925171320  |
| C | 2.992775390  | 11.421959900 | 4.002171320  |
| C | 1.671475390  | 11.452259900 | 4.364471320  |
| H | 1.379975390  | 10.947459900 | 5.089371320  |
| C | 0.759875390  | 12.233959900 | 3.654371320  |
| H | -0.132424610 | 12.267959900 | 3.913971320  |
| C | 1.192075390  | 12.951459900 | 2.571071320  |
| C | 2.516575390  | 12.939659900 | 2.205171320  |
| H | 2.806675390  | 13.442059900 | 1.478471320  |
| C | 3.412475390  | 12.174859900 | 2.928571320  |
| H | 4.310375390  | 12.167859900 | 2.685871320  |
| C | 7.432675390  | 9.102359900  | 3.139871320  |
| C | 8.373175390  | 8.584059900  | 2.108571320  |
| C | 8.365175390  | 9.115859900  | 0.836871320  |
| C | 9.223475390  | 8.627959900  | -0.161828680 |
| C | 10.071675390 | 7.635259900  | 0.195571320  |
| C | 10.130975390 | 7.081559900  | 1.429871320  |
| C | 9.284875390  | 7.577859900  | 2.395971320  |
| I | 10.748875390 | 15.875759900 | 10.817171320 |
| I | 13.041375390 | 2.877859900  | 10.541471320 |
| N | 8.128775390  | 8.774759900  | 7.162671320  |
| N | 6.013375390  | 10.523759900 | 6.107171320  |
| C | 8.982175390  | 7.787159900  | 7.588971320  |

|   |              |              |              |
|---|--------------|--------------|--------------|
| C | 9.934675390  | 8.386559900  | 8.470571320  |
| H | 10.629675390 | 7.944859900  | 8.903471320  |
| C | 9.655875390  | 9.693159900  | 8.563571320  |
| H | 10.128775390 | 10.317959900 | 9.064071320  |
| C | 8.507375390  | 9.954859900  | 7.761671320  |
| C | 7.848575390  | 11.173759900 | 7.626371320  |
| C | 6.681975390  | 11.428659900 | 6.871571320  |
| C | 5.990075390  | 12.686359900 | 6.776171320  |
| H | 6.218275390  | 13.477459900 | 7.207071320  |
| C | 4.945475390  | 12.497259900 | 5.939271320  |
| H | 4.334875390  | 13.149359900 | 5.678871320  |
| C | 4.934475390  | 11.139959900 | 5.526271320  |
| C | 8.881775390  | 6.419759900  | 7.285871320  |
| C | 8.486175390  | 12.340259900 | 8.360671320  |
| C | 7.982475390  | 12.806259900 | 9.547771320  |
| H | 7.197975390  | 12.438359900 | 9.883771320  |
| C | 8.619475390  | 13.817459900 | 10.262771320 |
| H | 8.275975390  | 14.113559900 | 11.074971320 |
| C | 9.762375390  | 14.369559900 | 9.745871320  |
| C | 10.260775390 | 13.923859900 | 8.568371320  |
| H | 11.039375390 | 14.298959900 | 8.224271320  |
| C | 9.613475390  | 12.907559900 | 7.869171320  |
| H | 9.959175390  | 12.614959900 | 7.057171320  |
| C | 9.868075390  | 5.523259900  | 7.980271320  |
| C | 11.189275390 | 5.492959900  | 7.617971320  |
| H | 11.480875390 | 5.997759900  | 6.893071320  |
| C | 12.100975390 | 4.711259900  | 8.328071320  |
| H | 12.993275390 | 4.677259900  | 8.068471320  |
| C | 11.668775390 | 3.993759900  | 9.411371320  |
| C | 10.344275390 | 4.005559900  | 9.777271320  |
| H | 10.054175390 | 3.503159900  | 10.503971320 |

|    |              |              |              |
|----|--------------|--------------|--------------|
| C  | 9.448375390  | 4.770359900  | 9.053871320  |
| H  | 8.550375390  | 4.777359900  | 9.296571320  |
| O  | 5.211375390  | 8.325759900  | 7.663871320  |
| O  | 6.319175390  | 7.061259900  | 9.123871320  |
| C  | 5.428175390  | 7.842859900  | 8.842471320  |
| C  | 4.487675390  | 8.361159900  | 9.873871320  |
| C  | 4.495675390  | 7.829359900  | 11.145571320 |
| C  | 3.637375390  | 8.317259900  | 12.144271320 |
| C  | 2.789075390  | 9.309959900  | 11.786771320 |
| C  | 2.729875390  | 9.863659900  | 10.552571320 |
| C  | 3.575975390  | 9.367359900  | 9.586471320  |
| Sn | 19.430924610 | 8.409540100  | 18.162128680 |
| I  | 15.112424610 | 1.006340100  | 13.336228680 |
| I  | 12.820024610 | 14.004240100 | 13.611928680 |
| N  | 17.732624610 | 8.107340100  | 16.990728680 |
| N  | 19.848024610 | 6.358340100  | 18.046228680 |
| O  | 20.650024610 | 8.556340100  | 16.489528680 |
| O  | 19.542224610 | 9.820840100  | 15.029428680 |
| C  | 16.879224610 | 9.094940100  | 16.564428680 |
| C  | 15.926724610 | 8.495540100  | 15.682828680 |
| H  | 15.231724610 | 8.937240100  | 15.249828680 |
| C  | 16.205524610 | 7.188940100  | 15.589828680 |
| H  | 15.732624610 | 6.564140100  | 15.089228680 |
| C  | 17.353924610 | 6.927240100  | 16.391728680 |
| C  | 18.012824610 | 5.708340100  | 16.526928680 |
| C  | 19.179424610 | 5.453440100  | 17.281728680 |
| C  | 19.871324610 | 4.195740100  | 17.377128680 |
| H  | 19.643124610 | 3.404640100  | 16.946328680 |
| C  | 20.915824610 | 4.384840100  | 18.214028680 |
| H  | 21.526524610 | 3.732740100  | 18.474428680 |
| C  | 20.926924610 | 5.742140100  | 18.627128680 |

|   |              |              |              |
|---|--------------|--------------|--------------|
| C | 16.979624610 | 10.462340100 | 16.867528680 |
| C | 17.375124610 | 4.541840100  | 15.792728680 |
| C | 17.878924610 | 4.075840100  | 14.605528680 |
| H | 18.663424610 | 4.443740100  | 14.269528680 |
| C | 17.241924610 | 3.064640100  | 13.890628680 |
| H | 17.585424610 | 2.768540100  | 13.078428680 |
| C | 16.099024610 | 2.512540100  | 14.407528680 |
| C | 15.600624610 | 2.958240100  | 15.585028680 |
| H | 14.822024610 | 2.583140100  | 15.929128680 |
| C | 16.247924610 | 3.974540100  | 16.284228680 |
| H | 15.902224610 | 4.267140100  | 17.096128680 |
| C | 15.993324610 | 11.358840100 | 16.173128680 |
| C | 14.672024610 | 11.389140100 | 16.535428680 |
| H | 14.380524610 | 10.884340100 | 17.260328680 |
| C | 13.760424610 | 12.170840100 | 15.825328680 |
| H | 12.868024610 | 12.204840100 | 16.084928680 |
| C | 14.192624610 | 12.888340100 | 14.742028680 |
| C | 15.517124610 | 12.876540100 | 14.376128680 |
| H | 15.807224610 | 13.378940100 | 13.649328680 |
| C | 16.413024610 | 12.111740100 | 15.099528680 |
| H | 17.310924610 | 12.104740100 | 14.856828680 |
| C | 20.433224610 | 9.039240100  | 15.310828680 |
| C | 21.373724610 | 8.520940100  | 14.279528680 |
| C | 21.365724610 | 9.052740100  | 13.007828680 |
| C | 22.224024610 | 8.564840100  | 12.009028680 |
| C | 23.072224610 | 7.572140100  | 12.366528680 |
| C | 23.131524610 | 7.018440100  | 13.600828680 |
| C | 22.285424610 | 7.514740100  | 14.566928680 |
| I | 23.749424610 | 15.812640100 | 22.988128680 |
| I | 26.041824610 | 2.814740100  | 22.712428680 |
| N | 21.129324610 | 8.711640100  | 19.333628680 |

|   |              |              |              |
|---|--------------|--------------|--------------|
| N | 19.013924610 | 10.460640100 | 18.278128680 |
| C | 21.982724610 | 7.724040100  | 19.759928680 |
| C | 22.935224610 | 8.323440100  | 20.641528680 |
| H | 23.630224610 | 7.881740100  | 21.074428680 |
| C | 22.656424610 | 9.630040100  | 20.734428680 |
| H | 23.129324610 | 10.254840100 | 21.235028680 |
| C | 21.507924610 | 9.891740100  | 19.932628680 |
| C | 20.849024610 | 11.110640100 | 19.797328680 |
| C | 19.682524610 | 11.365540100 | 19.042528680 |
| C | 18.990624610 | 12.623240100 | 18.947128680 |
| H | 19.218724610 | 13.414340100 | 19.378028680 |
| C | 17.946024610 | 12.434140100 | 18.110228680 |
| H | 17.335424610 | 13.086240100 | 17.849828680 |
| C | 17.935024610 | 11.076840100 | 17.697228680 |
| C | 21.882324610 | 6.356640100  | 19.456728680 |
| C | 21.486724610 | 12.277140100 | 20.531628680 |
| C | 20.983024610 | 12.743140100 | 21.718728680 |
| H | 20.198524610 | 12.375240100 | 22.054728680 |
| C | 21.619924610 | 13.754340100 | 22.433628680 |
| H | 21.276524610 | 14.050440100 | 23.245928680 |
| C | 22.762824610 | 14.306440100 | 21.916828680 |
| C | 23.261324610 | 13.860740100 | 20.739328680 |
| H | 24.039924610 | 14.235840100 | 20.395128680 |
| C | 22.613924610 | 12.844440100 | 20.040028680 |
| H | 22.959624610 | 12.551840100 | 19.228128680 |
| C | 22.868624610 | 5.460140100  | 20.151128680 |
| C | 24.189824610 | 5.429840100  | 19.788828680 |
| H | 24.481424610 | 5.934640100  | 19.063928680 |
| C | 25.101524610 | 4.648140100  | 20.499028680 |
| H | 25.993824610 | 4.614140100  | 20.239428680 |
| C | 24.669324610 | 3.930640100  | 21.582228680 |

|   |              |              |              |
|---|--------------|--------------|--------------|
| C | 23.344824610 | 3.942440100  | 21.948228680 |
| H | 23.054724610 | 3.440040100  | 22.674928680 |
| C | 22.448824610 | 4.707240100  | 21.224828680 |
| H | 21.550924610 | 4.714240100  | 21.467428680 |
| O | 18.211824610 | 8.262640100  | 19.834728680 |
| O | 19.319724610 | 6.998140100  | 21.294828680 |
| C | 18.428724610 | 7.779740100  | 21.013428680 |
| C | 17.488224610 | 8.298040100  | 22.044828680 |
| C | 17.496224610 | 7.766240100  | 23.316428680 |
| C | 16.637924610 | 8.254140100  | 24.315228680 |
| C | 15.789624610 | 9.246840100  | 23.957728680 |
| C | 15.730424610 | 9.800540100  | 22.723528680 |
| C | 16.576524610 | 9.304240100  | 21.757328680 |
| F | 10.887147260 | 7.123375080  | -0.750726490 |
| F | 1.973603510  | 9.821844710  | 12.733069140 |
| H | 3.653939600  | 7.925240330  | 13.139734170 |
| H | 2.047389980  | 10.658684630 | 10.335662710 |
| H | 9.206911180  | 9.019979470  | -1.157291520 |
| H | 10.813475670 | 6.286517840  | 1.646669600  |
| H | 22.207460400 | 8.956859670  | 11.013565830 |
| H | 23.814024900 | 6.223398050  | 13.817626950 |
| H | 16.654488820 | 7.862120530  | 25.310691520 |
| H | 15.047870960 | 10.595510300 | 22.506634940 |
| F | 23.887696490 | 7.060255290  | 11.420230860 |
| F | 14.974152740 | 9.758724920  | 24.904026490 |
| H | 9.332422590  | 7.180328540  | 3.388245510  |
| H | 7.693174670  | 9.916003170  | 0.606467790  |
| H | 5.167676100  | 7.029216630  | 11.375974850 |
| H | 3.528428190  | 9.764891260  | 8.594197120  |
| H | 22.332976540 | 7.117169070  | 15.559186760 |
| H | 20.693723900 | 9.852883370  | 12.777425150 |



|   |              |             |              |
|---|--------------|-------------|--------------|
| H | 18.168209780 | 6.966115360 | 23.546941910 |
| H | 16.528972690 | 9.701811130 | 20.765070610 |

**Coordinates for dimer model of compound 2**

|    |              |              |             |
|----|--------------|--------------|-------------|
| Sn | 6.440861710  | 8.463183850  | 6.005321990 |
| I  | 2.122361710  | 1.059983850  | 1.179421990 |
| I  | -0.170038290 | 14.057883850 | 1.455121990 |
| N  | 4.742561710  | 8.160983850  | 4.833921990 |
| N  | 6.857961710  | 6.411983850  | 5.889421990 |
| O  | 7.659961710  | 8.609983850  | 4.332721990 |
| O  | 6.552161710  | 9.874483850  | 2.872621990 |
| C  | 3.889161710  | 9.148583850  | 4.407621990 |
| C  | 2.936661710  | 8.549183850  | 3.526021990 |
| H  | 2.241661710  | 8.990883850  | 3.093021990 |
| C  | 3.215461710  | 7.242583850  | 3.433021990 |
| H  | 2.742561710  | 6.617783850  | 2.932421990 |
| C  | 4.363961710  | 6.980883850  | 4.234921990 |
| C  | 5.022761710  | 5.761983850  | 4.370221990 |
| C  | 6.189361710  | 5.507083850  | 5.124921990 |
| C  | 6.881261710  | 4.249383850  | 5.220421990 |
| H  | 6.653061710  | 3.458283850  | 4.789521990 |
| C  | 7.925861710  | 4.438483850  | 6.057321990 |
| H  | 8.536461710  | 3.786383850  | 6.317721990 |
| C  | 7.936861710  | 5.795783850  | 6.470321990 |
| C  | 3.989561710  | 10.515983850 | 4.710721990 |
| C  | 4.385061710  | 4.595483850  | 3.635921990 |
| C  | 4.888861710  | 4.129483850  | 2.448821990 |
| H  | 5.673361710  | 4.497383850  | 2.112821990 |
| C  | 4.251861710  | 3.118283850  | 1.733821990 |
| H  | 4.595361710  | 2.822183850  | 0.921621990 |
| C  | 3.108961710  | 2.566183850  | 2.250721990 |
| C  | 2.610561710  | 3.011883850  | 3.428221990 |

|   |              |              |              |
|---|--------------|--------------|--------------|
| H | 1.831961710  | 2.636783850  | 3.772321990  |
| C | 3.257861710  | 4.028183850  | 4.127421990  |
| H | 2.912161710  | 4.320783850  | 4.939321990  |
| C | 3.003261710  | 11.412483850 | 4.016321990  |
| C | 1.681961710  | 11.442783850 | 4.378621990  |
| H | 1.390461710  | 10.937983850 | 5.103521990  |
| C | 0.770361710  | 12.224483850 | 3.668521990  |
| H | -0.121938290 | 12.258483850 | 3.928121990  |
| C | 1.202561710  | 12.941983850 | 2.585221990  |
| C | 2.527061710  | 12.930183850 | 2.219321990  |
| H | 2.817161710  | 13.432583850 | 1.492621990  |
| C | 3.422961710  | 12.165383850 | 2.942721990  |
| H | 4.320861710  | 12.158383850 | 2.700021990  |
| C | 7.443161710  | 9.092883850  | 3.154021990  |
| C | 8.383661710  | 8.574583850  | 2.122721990  |
| C | 8.375661710  | 9.106383850  | 0.851021990  |
| C | 9.233961710  | 8.618483850  | -0.147678010 |
| C | 10.082161710 | 7.625783850  | 0.209721990  |
| C | 10.141461710 | 7.072083850  | 1.444021990  |
| C | 9.295361710  | 7.568383850  | 2.410121990  |
| I | 10.759361710 | 15.866283850 | 10.831321990 |
| I | 13.051861710 | 2.868383850  | 10.555621990 |
| N | 8.139261710  | 8.765283850  | 7.176821990  |
| N | 6.023861710  | 10.514283850 | 6.121321990  |
| C | 8.992661710  | 7.777683850  | 7.603121990  |
| C | 9.945161710  | 8.377083850  | 8.484721990  |
| H | 10.640161710 | 7.935383850  | 8.917621990  |
| C | 9.666361710  | 9.683683850  | 8.577721990  |
| H | 10.139261710 | 10.308483850 | 9.078221990  |
| C | 8.517861710  | 9.945383850  | 7.775821990  |
| C | 7.859061710  | 11.164283850 | 7.640521990  |

|   |              |              |              |
|---|--------------|--------------|--------------|
| C | 6.692461710  | 11.419183850 | 6.885721990  |
| C | 6.000561710  | 12.676883850 | 6.790321990  |
| H | 6.228761710  | 13.467983850 | 7.221221990  |
| C | 4.955961710  | 12.487783850 | 5.953421990  |
| H | 4.345361710  | 13.139883850 | 5.693021990  |
| C | 4.944961710  | 11.130483850 | 5.540421990  |
| C | 8.892261710  | 6.410283850  | 7.300021990  |
| C | 8.496661710  | 12.330783850 | 8.374821990  |
| C | 7.992961710  | 12.796783850 | 9.561921990  |
| H | 7.208461710  | 12.428883850 | 9.897921990  |
| C | 8.629961710  | 13.807983850 | 10.276921990 |
| H | 8.286461710  | 14.104083850 | 11.089121990 |
| C | 9.772861710  | 14.360083850 | 9.760021990  |
| C | 10.271261710 | 13.914383850 | 8.582521990  |
| H | 11.049861710 | 14.289483850 | 8.238421990  |
| C | 9.623961710  | 12.898083850 | 7.883321990  |
| H | 9.969661710  | 12.605483850 | 7.071321990  |
| C | 9.878561710  | 5.513783850  | 7.994421990  |
| C | 11.199761710 | 5.483483850  | 7.632121990  |
| H | 11.491361710 | 5.988283850  | 6.907221990  |
| C | 12.111461710 | 4.701783850  | 8.342221990  |
| H | 13.003761710 | 4.667783850  | 8.082621990  |
| C | 11.679261710 | 3.984283850  | 9.425521990  |
| C | 10.354761710 | 3.996083850  | 9.791421990  |
| H | 10.064661710 | 3.493683850  | 10.518121990 |
| C | 9.458861710  | 4.760883850  | 9.068021990  |
| H | 8.560861710  | 4.767883850  | 9.310721990  |
| O | 5.221861710  | 8.316283850  | 7.678021990  |
| O | 6.329661710  | 7.051783850  | 9.138021990  |
| C | 5.438661710  | 7.833383850  | 8.856621990  |
| C | 4.498161710  | 8.351683850  | 9.888021990  |

|    |              |              |              |
|----|--------------|--------------|--------------|
| C  | 4.506161710  | 7.819883850  | 11.159721990 |
| C  | 3.647861710  | 8.307783850  | 12.158421990 |
| C  | 2.799561710  | 9.300483850  | 11.800921990 |
| C  | 2.740361710  | 9.854183850  | 10.566721990 |
| C  | 3.586461710  | 9.357883850  | 9.600621990  |
| Sn | 19.420438290 | 8.419016150  | 18.147978010 |
| I  | 15.101938290 | 1.015816150  | 13.322078010 |
| I  | 12.809538290 | 14.013716150 | 13.597778010 |
| N  | 17.722138290 | 8.116816150  | 16.976578010 |
| N  | 19.837538290 | 6.367816150  | 18.032078010 |
| O  | 20.639538290 | 8.565816150  | 16.475378010 |
| O  | 19.531738290 | 9.830316150  | 15.015278010 |
| C  | 16.868738290 | 9.104416150  | 16.550278010 |
| C  | 15.916238290 | 8.505016150  | 15.668678010 |
| H  | 15.221238290 | 8.946716150  | 15.235678010 |
| C  | 16.195038290 | 7.198416150  | 15.575678010 |
| H  | 15.722138290 | 6.573616150  | 15.075078010 |
| C  | 17.343438290 | 6.936716150  | 16.377578010 |
| C  | 18.002338290 | 5.717816150  | 16.512778010 |
| C  | 19.168938290 | 5.462916150  | 17.267578010 |
| C  | 19.860838290 | 4.205216150  | 17.362978010 |
| H  | 19.632638290 | 3.414116150  | 16.932178010 |
| C  | 20.905338290 | 4.394316150  | 18.199878010 |
| H  | 21.516038290 | 3.742216150  | 18.460278010 |
| C  | 20.916438290 | 5.751616150  | 18.612978010 |
| C  | 16.969138290 | 10.471816150 | 16.853378010 |
| C  | 17.364638290 | 4.551316150  | 15.778578010 |
| C  | 17.868438290 | 4.085316150  | 14.591378010 |
| H  | 18.652938290 | 4.453216150  | 14.255378010 |
| C  | 17.231438290 | 3.074116150  | 13.876478010 |
| H  | 17.574938290 | 2.778016150  | 13.064278010 |

|   |              |              |              |
|---|--------------|--------------|--------------|
| C | 16.088538290 | 2.522016150  | 14.393378010 |
| C | 15.590138290 | 2.967716150  | 15.570878010 |
| H | 14.811538290 | 2.592616150  | 15.914978010 |
| C | 16.237438290 | 3.984016150  | 16.270078010 |
| H | 15.891738290 | 4.276616150  | 17.081978010 |
| C | 15.982838290 | 11.368316150 | 16.158978010 |
| C | 14.661538290 | 11.398616150 | 16.521278010 |
| H | 14.370038290 | 10.893816150 | 17.246178010 |
| C | 13.749938290 | 12.180316150 | 15.811178010 |
| H | 12.857538290 | 12.214316150 | 16.070778010 |
| C | 14.182138290 | 12.897816150 | 14.727878010 |
| C | 15.506638290 | 12.886016150 | 14.361978010 |
| H | 15.796738290 | 13.388416150 | 13.635178010 |
| C | 16.402538290 | 12.121216150 | 15.085378010 |
| H | 17.300438290 | 12.114216150 | 14.842678010 |
| C | 20.422738290 | 9.048716150  | 15.296678010 |
| C | 21.363238290 | 8.530416150  | 14.265378010 |
| C | 21.355238290 | 9.062216150  | 12.993678010 |
| C | 22.213538290 | 8.574316150  | 11.994878010 |
| C | 23.061738290 | 7.581616150  | 12.352378010 |
| C | 23.121038290 | 7.027916150  | 13.586678010 |
| C | 22.274938290 | 7.524216150  | 14.552778010 |
| I | 23.738938290 | 15.822116150 | 22.973978010 |
| I | 26.031338290 | 2.824216150  | 22.698278010 |
| N | 21.118838290 | 8.721116150  | 19.319478010 |
| N | 19.003438290 | 10.470116150 | 18.263978010 |
| C | 21.972238290 | 7.733516150  | 19.745778010 |
| C | 22.924738290 | 8.332916150  | 20.627378010 |
| H | 23.619738290 | 7.891216150  | 21.060278010 |
| C | 22.645938290 | 9.639516150  | 20.720278010 |
| H | 23.118838290 | 10.264316150 | 21.220878010 |

|   |              |              |              |
|---|--------------|--------------|--------------|
| C | 21.497438290 | 9.901216150  | 19.918478010 |
| C | 20.838538290 | 11.120116150 | 19.783178010 |
| C | 19.672038290 | 11.375016150 | 19.028378010 |
| C | 18.980138290 | 12.632716150 | 18.932978010 |
| H | 19.208238290 | 13.423816150 | 19.363878010 |
| C | 17.935538290 | 12.443616150 | 18.096078010 |
| H | 17.324938290 | 13.095716150 | 17.835678010 |
| C | 17.924538290 | 11.086316150 | 17.683078010 |
| C | 21.871838290 | 6.366116150  | 19.442578010 |
| C | 21.476238290 | 12.286616150 | 20.517478010 |
| C | 20.972538290 | 12.752616150 | 21.704578010 |
| H | 20.188038290 | 12.384716150 | 22.040578010 |
| C | 21.609438290 | 13.763816150 | 22.419478010 |
| H | 21.266038290 | 14.059916150 | 23.231778010 |
| C | 22.752338290 | 14.315916150 | 21.902678010 |
| C | 23.250838290 | 13.870216150 | 20.725178010 |
| H | 24.029438290 | 14.245316150 | 20.380978010 |
| C | 22.603438290 | 12.853916150 | 20.025878010 |
| H | 22.949138290 | 12.561316150 | 19.213978010 |
| C | 22.858138290 | 5.469616150  | 20.136978010 |
| C | 24.179338290 | 5.439316150  | 19.774678010 |
| H | 24.470938290 | 5.944116150  | 19.049778010 |
| C | 25.091038290 | 4.657616150  | 20.484878010 |
| H | 25.983338290 | 4.623616150  | 20.225278010 |
| C | 24.658838290 | 3.940116150  | 21.568078010 |
| C | 23.334338290 | 3.951916150  | 21.934078010 |
| H | 23.044238290 | 3.449516150  | 22.660778010 |
| C | 22.438338290 | 4.716716150  | 21.210678010 |
| H | 21.540438290 | 4.723716150  | 21.453278010 |
| O | 18.201338290 | 8.272116150  | 19.820578010 |
| O | 19.309238290 | 7.007616150  | 21.280678010 |

|   |              |              |              |
|---|--------------|--------------|--------------|
| C | 18.418238290 | 7.789216150  | 20.999278010 |
| C | 17.477738290 | 8.307516150  | 22.030678010 |
| C | 17.485738290 | 7.775716150  | 23.302278010 |
| C | 16.627438290 | 8.263616150  | 24.301078010 |
| C | 15.779138290 | 9.256316150  | 23.943578010 |
| C | 15.719938290 | 9.810016150  | 22.709378010 |
| C | 16.566038290 | 9.313716150  | 21.743178010 |
| F | 3.668760480  | 7.813179720  | 13.414379790 |
| F | 1.879281990  | 10.857252440 | 10.293052240 |
| F | 11.002560200 | 6.068993400  | 1.717552520  |
| F | 9.213062940  | 9.113087980  | -1.403635810 |
| F | 16.648337060 | 7.769012020  | 25.557035810 |
| F | 14.858772460 | 10.813015930 | 22.435727030 |
| F | 23.982136780 | 6.024825700  | 13.860208540 |
| F | 22.192639520 | 9.068920280  | 10.738920210 |
| H | 10.728498680 | 7.220067740  | -0.540306650 |
| H | 2.153224740  | 9.706199960  | 12.550950630 |
| H | 15.132801320 | 9.662032260  | 24.693606650 |
| H | 23.708075260 | 7.175900040  | 11.602349370 |
| H | 9.342908910  | 7.170852490  | 3.402396180  |
| H | 7.703660990  | 9.906527120  | 0.620618460  |
| H | 5.178162430  | 7.019740580  | 11.390125520 |
| H | 3.538914520  | 9.755415210  | 8.608347790  |
| H | 20.683237570 | 9.862359420  | 12.763274480 |
| H | 22.322490220 | 7.126645120  | 15.545036090 |
| H | 18.157723450 | 6.975591410  | 23.532791240 |
| H | 16.518486360 | 9.711287180  | 20.750919940 |

**Coordinates for dimer model of compound 4**

|    |              |              |             |
|----|--------------|--------------|-------------|
| Sn | 6.456591200  | 8.448969780  | 6.026547990 |
| I  | 2.138091200  | 1.045769780  | 1.200647990 |
| I  | -0.154308800 | 14.043669780 | 1.476347990 |

|   |             |              |             |
|---|-------------|--------------|-------------|
| N | 4.758291200 | 8.146769780  | 4.855147990 |
| N | 6.873691200 | 6.397769780  | 5.910647990 |
| O | 7.675691200 | 8.595769780  | 4.353947990 |
| O | 6.567891200 | 9.860269780  | 2.893847990 |
| C | 3.904891200 | 9.134369780  | 4.428847990 |
| C | 2.952391200 | 8.534969780  | 3.547247990 |
| H | 2.257391200 | 8.976669780  | 3.114247990 |
| C | 3.231191200 | 7.228369780  | 3.454247990 |
| H | 2.758291200 | 6.603569780  | 2.953647990 |
| C | 4.379691200 | 6.966669780  | 4.256147990 |
| C | 5.038491200 | 5.747769780  | 4.391447990 |
| C | 6.205091200 | 5.492869780  | 5.146147990 |
| C | 6.896991200 | 4.235169780  | 5.241647990 |
| H | 6.668791200 | 3.444069780  | 4.810747990 |
| C | 7.941591200 | 4.424269780  | 6.078547990 |
| H | 8.552191200 | 3.772169780  | 6.338947990 |
| C | 7.952591200 | 5.781569780  | 6.491547990 |
| C | 4.005291200 | 10.501769780 | 4.731947990 |
| C | 4.400791200 | 4.581269780  | 3.657147990 |
| C | 4.904591200 | 4.115269780  | 2.470047990 |
| H | 5.689091200 | 4.483169780  | 2.134047990 |
| C | 4.267591200 | 3.104069780  | 1.755047990 |
| H | 4.611091200 | 2.807969780  | 0.942847990 |
| C | 3.124691200 | 2.551969780  | 2.271947990 |
| C | 2.626291200 | 2.997669780  | 3.449447990 |
| H | 1.847691200 | 2.622569780  | 3.793547990 |
| C | 3.273591200 | 4.013969780  | 4.148647990 |
| H | 2.927891200 | 4.306569780  | 4.960547990 |
| C | 3.018991200 | 11.398269780 | 4.037547990 |
| C | 1.697691200 | 11.428569780 | 4.399847990 |
| H | 1.406191200 | 10.923769780 | 5.124747990 |



|   |              |              |              |
|---|--------------|--------------|--------------|
| C | 0.786091200  | 12.210269780 | 3.689747990  |
| H | -0.106208800 | 12.244269780 | 3.949347990  |
| C | 1.218291200  | 12.927769780 | 2.606447990  |
| C | 2.542791200  | 12.915969780 | 2.240547990  |
| H | 2.832891200  | 13.418369780 | 1.513847990  |
| C | 3.438691200  | 12.151169780 | 2.963947990  |
| H | 4.336591200  | 12.144169780 | 2.721247990  |
| C | 7.458891200  | 9.078669780  | 3.175247990  |
| C | 8.399391200  | 8.560369780  | 2.143947990  |
| C | 8.391391200  | 9.092169780  | 0.872247990  |
| C | 9.249691200  | 8.604269780  | -0.126452010 |
| C | 10.097891200 | 7.611569780  | 0.230947990  |
| C | 10.157191200 | 7.057869780  | 1.465247990  |
| C | 9.311091200  | 7.554169780  | 2.431347990  |
| I | 10.775091200 | 15.852069780 | 10.852547990 |
| I | 13.067591200 | 2.854169780  | 10.576847990 |
| N | 8.154991200  | 8.751069780  | 7.198047990  |
| N | 6.039591200  | 10.500069780 | 6.142547990  |
| C | 9.008391200  | 7.763469780  | 7.624347990  |
| C | 9.960891200  | 8.362869780  | 8.505947990  |
| H | 10.655891200 | 7.921169780  | 8.938847990  |
| C | 9.682091200  | 9.669469780  | 8.598947990  |
| H | 10.154991200 | 10.294269780 | 9.099447990  |
| C | 8.533591200  | 9.931169780  | 7.797047990  |
| C | 7.874791200  | 11.150069780 | 7.661747990  |
| C | 6.708191200  | 11.404969780 | 6.906947990  |
| C | 6.016291200  | 12.662669780 | 6.811547990  |
| H | 6.244491200  | 13.453769780 | 7.242447990  |
| C | 4.971691200  | 12.473569780 | 5.974647990  |
| H | 4.361091200  | 13.125669780 | 5.714247990  |
| C | 4.960691200  | 11.116269780 | 5.561647990  |

|    |              |              |              |
|----|--------------|--------------|--------------|
| C  | 8.907991200  | 6.396069780  | 7.321247990  |
| C  | 8.512391200  | 12.316569780 | 8.396047990  |
| C  | 8.008691200  | 12.782569780 | 9.583147990  |
| H  | 7.224191200  | 12.414669780 | 9.919147990  |
| C  | 8.645691200  | 13.793769780 | 10.298147990 |
| H  | 8.302191200  | 14.089869780 | 11.110347990 |
| C  | 9.788591200  | 14.345869780 | 9.781247990  |
| C  | 10.286991200 | 13.900169780 | 8.603747990  |
| H  | 11.065591200 | 14.275269780 | 8.259647990  |
| C  | 9.639691200  | 12.883869780 | 7.904547990  |
| H  | 9.985391200  | 12.591269780 | 7.092547990  |
| C  | 9.894291200  | 5.499569780  | 8.015647990  |
| C  | 11.215491200 | 5.469269780  | 7.653347990  |
| H  | 11.507091200 | 5.974069780  | 6.928447990  |
| C  | 12.127191200 | 4.687569780  | 8.363447990  |
| H  | 13.019491200 | 4.653569780  | 8.103847990  |
| C  | 11.694991200 | 3.970069780  | 9.446747990  |
| C  | 10.370491200 | 3.981869780  | 9.812647990  |
| H  | 10.080391200 | 3.479469780  | 10.539347990 |
| C  | 9.474591200  | 4.746669780  | 9.089247990  |
| H  | 8.576591200  | 4.753669780  | 9.331947990  |
| O  | 5.237591200  | 8.302069780  | 7.699247990  |
| O  | 6.345391200  | 7.037569780  | 9.159247990  |
| C  | 5.454391200  | 7.819169780  | 8.877847990  |
| C  | 4.513891200  | 8.337469780  | 9.909247990  |
| C  | 4.521891200  | 7.805669780  | 11.180947990 |
| C  | 3.663591200  | 8.293569780  | 12.179647990 |
| C  | 2.815291200  | 9.286269780  | 11.822147990 |
| C  | 2.756091200  | 9.839969780  | 10.587947990 |
| C  | 3.602191200  | 9.343669780  | 9.621847990  |
| Sn | 19.404708800 | 8.433230220  | 18.126752010 |

|   |              |              |              |
|---|--------------|--------------|--------------|
| I | 15.086208800 | 1.030030220  | 13.300852010 |
| I | 12.793808800 | 14.027930220 | 13.576552010 |
| N | 17.706408800 | 8.131030220  | 16.955352010 |
| N | 19.821808800 | 6.382030220  | 18.010852010 |
| O | 20.623808800 | 8.580030220  | 16.454152010 |
| O | 19.516008800 | 9.844530220  | 14.994052010 |
| C | 16.853008800 | 9.118630220  | 16.529052010 |
| C | 15.900508800 | 8.519230220  | 15.647452010 |
| H | 15.205508800 | 8.960930220  | 15.214452010 |
| C | 16.179308800 | 7.212630220  | 15.554452010 |
| H | 15.706408800 | 6.587830220  | 15.053852010 |
| C | 17.327708800 | 6.950930220  | 16.356352010 |
| C | 17.986608800 | 5.732030220  | 16.491552010 |
| C | 19.153208800 | 5.477130220  | 17.246352010 |
| C | 19.845108800 | 4.219430220  | 17.341752010 |
| H | 19.616908800 | 3.428330220  | 16.910952010 |
| C | 20.889608800 | 4.408530220  | 18.178652010 |
| H | 21.500308800 | 3.756430220  | 18.439052010 |
| C | 20.900708800 | 5.765830220  | 18.591752010 |
| C | 16.953408800 | 10.486030220 | 16.832152010 |
| C | 17.348908800 | 4.565530220  | 15.757352010 |
| C | 17.852708800 | 4.099530220  | 14.570152010 |
| H | 18.637208800 | 4.467430220  | 14.234152010 |
| C | 17.215708800 | 3.088330220  | 13.855252010 |
| H | 17.559208800 | 2.792230220  | 13.043052010 |
| C | 16.072808800 | 2.536230220  | 14.372152010 |
| C | 15.574408800 | 2.981930220  | 15.549652010 |
| H | 14.795808800 | 2.606830220  | 15.893752010 |
| C | 16.221708800 | 3.998230220  | 16.248852010 |
| H | 15.876008800 | 4.290830220  | 17.060752010 |
| C | 15.967108800 | 11.382530220 | 16.137752010 |

|   |              |              |              |
|---|--------------|--------------|--------------|
| C | 14.645808800 | 11.412830220 | 16.500052010 |
| H | 14.354308800 | 10.908030220 | 17.224952010 |
| C | 13.734208800 | 12.194530220 | 15.789952010 |
| H | 12.841808800 | 12.228530220 | 16.049552010 |
| C | 14.166408800 | 12.912030220 | 14.706652010 |
| C | 15.490908800 | 12.900230220 | 14.340752010 |
| H | 15.781008800 | 13.402630220 | 13.613952010 |
| C | 16.386808800 | 12.135430220 | 15.064152010 |
| H | 17.284708800 | 12.128430220 | 14.821452010 |
| C | 20.407008800 | 9.062930220  | 15.275452010 |
| C | 21.347508800 | 8.544630220  | 14.244152010 |
| C | 21.339508800 | 9.076430220  | 12.972452010 |
| C | 22.197808800 | 8.588530220  | 11.973652010 |
| C | 23.046008800 | 7.595830220  | 12.331152010 |
| C | 23.105308800 | 7.042130220  | 13.565452010 |
| C | 22.259208800 | 7.538430220  | 14.531552010 |
| I | 23.723208800 | 15.836330220 | 22.952752010 |
| I | 26.015608800 | 2.838430220  | 22.677052010 |
| N | 21.103108800 | 8.735330220  | 19.298252010 |
| N | 18.987708800 | 10.484330220 | 18.242752010 |
| C | 21.956508800 | 7.747730220  | 19.724552010 |
| C | 22.909008800 | 8.347130220  | 20.606152010 |
| H | 23.604008800 | 7.905430220  | 21.039052010 |
| C | 22.630208800 | 9.653730220  | 20.699052010 |
| H | 23.103108800 | 10.278530220 | 21.199652010 |
| C | 21.481708800 | 9.915430220  | 19.897252010 |
| C | 20.822808800 | 11.134330220 | 19.761952010 |
| C | 19.656308800 | 11.389230220 | 19.007152010 |
| C | 18.964408800 | 12.646930220 | 18.911752010 |
| H | 19.192508800 | 13.438030220 | 19.342652010 |
| C | 17.919808800 | 12.457830220 | 18.074852010 |

|   |              |              |              |
|---|--------------|--------------|--------------|
| H | 17.309208800 | 13.109930220 | 17.814452010 |
| C | 17.908808800 | 11.100530220 | 17.661852010 |
| C | 21.856108800 | 6.380330220  | 19.421352010 |
| C | 21.460508800 | 12.300830220 | 20.496252010 |
| C | 20.956808800 | 12.766830220 | 21.683352010 |
| H | 20.172308800 | 12.398930220 | 22.019352010 |
| C | 21.593708800 | 13.778030220 | 22.398252010 |
| H | 21.250308800 | 14.074130220 | 23.210552010 |
| C | 22.736608800 | 14.330130220 | 21.881452010 |
| C | 23.235108800 | 13.884430220 | 20.703952010 |
| H | 24.013708800 | 14.259530220 | 20.359752010 |
| C | 22.587708800 | 12.868130220 | 20.004652010 |
| H | 22.933408800 | 12.575530220 | 19.192752010 |
| C | 22.842408800 | 5.483830220  | 20.115752010 |
| C | 24.163608800 | 5.453530220  | 19.753452010 |
| H | 24.455208800 | 5.958330220  | 19.028552010 |
| C | 25.075308800 | 4.671830220  | 20.463652010 |
| H | 25.967608800 | 4.637830220  | 20.204052010 |
| C | 24.643108800 | 3.954330220  | 21.546852010 |
| C | 23.318608800 | 3.966130220  | 21.912852010 |
| H | 23.028508800 | 3.463730220  | 22.639552010 |
| C | 22.422608800 | 4.730930220  | 21.189452010 |
| H | 21.524708800 | 4.737930220  | 21.432052010 |
| O | 18.185608800 | 8.286330220  | 19.799352010 |
| O | 19.293508800 | 7.021830220  | 21.259452010 |
| C | 18.402508800 | 7.803430220  | 20.978052010 |
| C | 17.462008800 | 8.321730220  | 22.009452010 |
| C | 17.470008800 | 7.789930220  | 23.281052010 |
| C | 16.611708800 | 8.277830220  | 24.279852010 |
| C | 15.763408800 | 9.270530220  | 23.922352010 |
| C | 15.704208800 | 9.824230220  | 22.688152010 |

|   |              |              |              |
|---|--------------|--------------|--------------|
| C | 16.550308800 | 9.327930220  | 21.721952010 |
| F | 9.371080660  | 7.052611520  | 3.683282730  |
| F | 7.543539820  | 10.101696330 | 0.581551950  |
| F | 10.913363070 | 7.099684960  | -0.715349820 |
| F | 5.369742570  | 6.796143220  | 11.471644040 |
| F | 3.542201750  | 9.845228030  | 8.369913260  |
| F | 1.999819320  | 9.798154590  | 12.768445810 |
| H | 3.680155410  | 7.901550210  | 13.175110840 |
| H | 2.073605790  | 10.634994510 | 10.371039380 |
| H | 9.233126990  | 8.996289350  | -1.121914850 |
| H | 10.839691480 | 6.262827720  | 1.682046270  |
| H | 22.181244590 | 8.980549790  | 10.978189160 |
| H | 23.787809090 | 6.247088170  | 13.782250280 |
| H | 16.628273010 | 7.885810650  | 25.275314850 |
| H | 15.021655150 | 10.619200420 | 22.471258270 |
| F | 20.491657430 | 10.085956780 | 12.681755960 |
| F | 22.319204230 | 7.036821920  | 15.783466400 |
| F | 23.861480680 | 7.083945410  | 11.384854190 |
| F | 16.490313380 | 9.829538540  | 20.470037610 |
| F | 18.317840550 | 6.780427050  | 23.571886450 |
| F | 14.947936930 | 9.782415040  | 24.868649820 |

**Coordinates for dimer model of compound 6**

|    |             |             |            |
|----|-------------|-------------|------------|
| Sn | 6.46530000  | 8.44110000  | 6.03830000 |
| I  | 2.14680000  | 1.03790000  | 1.21240000 |
| I  | -0.14560000 | 14.03580000 | 1.48810000 |
| N  | 4.76700000  | 8.13890000  | 4.86690000 |
| N  | 6.88240000  | 6.38990000  | 5.92240000 |
| O  | 7.68440000  | 8.58790000  | 4.36570000 |
| O  | 6.57660000  | 9.85240000  | 2.90560000 |
| C  | 3.91360000  | 9.12650000  | 4.44060000 |
| C  | 2.96110000  | 8.52710000  | 3.55900000 |

|   |             |             |            |
|---|-------------|-------------|------------|
| H | 2.26610000  | 8.96880000  | 3.12600000 |
| C | 3.23990000  | 7.22050000  | 3.46600000 |
| H | 2.76700000  | 6.59570000  | 2.96540000 |
| C | 4.38840000  | 6.95880000  | 4.26790000 |
| C | 5.04720000  | 5.73990000  | 4.40320000 |
| C | 6.21380000  | 5.48500000  | 5.15790000 |
| C | 6.90570000  | 4.22730000  | 5.25340000 |
| H | 6.67750000  | 3.43620000  | 4.82250000 |
| C | 7.95030000  | 4.41640000  | 6.09030000 |
| H | 8.56090000  | 3.76430000  | 6.35070000 |
| C | 7.96130000  | 5.77370000  | 6.50330000 |
| C | 4.01400000  | 10.49390000 | 4.74370000 |
| C | 4.40950000  | 4.57340000  | 3.66890000 |
| C | 4.91330000  | 4.10740000  | 2.48180000 |
| H | 5.69780000  | 4.47530000  | 2.14580000 |
| C | 4.27630000  | 3.09620000  | 1.76680000 |
| H | 4.61980000  | 2.80010000  | 0.95460000 |
| C | 3.13340000  | 2.54410000  | 2.28370000 |
| C | 2.63500000  | 2.98980000  | 3.46120000 |
| H | 1.85640000  | 2.61470000  | 3.80530000 |
| C | 3.28230000  | 4.00610000  | 4.16040000 |
| H | 2.93660000  | 4.29870000  | 4.97230000 |
| C | 3.02770000  | 11.39040000 | 4.04930000 |
| C | 1.70640000  | 11.42070000 | 4.41160000 |
| H | 1.41490000  | 10.91590000 | 5.13650000 |
| C | 0.79480000  | 12.20240000 | 3.70150000 |
| H | -0.09750000 | 12.23640000 | 3.96110000 |
| C | 1.22700000  | 12.91990000 | 2.61820000 |
| C | 2.55150000  | 12.90810000 | 2.25230000 |
| H | 2.84160000  | 13.41050000 | 1.52560000 |
| C | 3.44740000  | 12.14330000 | 2.97570000 |

|   |             |             |             |
|---|-------------|-------------|-------------|
| H | 4.34530000  | 12.13630000 | 2.73300000  |
| C | 7.46760000  | 9.07080000  | 3.18700000  |
| C | 8.40810000  | 8.55250000  | 2.15570000  |
| C | 8.40010000  | 9.08430000  | 0.88400000  |
| C | 9.25840000  | 8.59640000  | -0.11470000 |
| C | 10.10660000 | 7.60370000  | 0.24270000  |
| C | 10.16590000 | 7.05000000  | 1.47700000  |
| C | 9.31980000  | 7.54630000  | 2.44310000  |
| I | 10.78380000 | 15.84420000 | 10.86430000 |
| I | 13.07630000 | 2.84630000  | 10.58860000 |
| N | 8.16370000  | 8.74320000  | 7.20980000  |
| N | 6.04830000  | 10.49220000 | 6.15430000  |
| C | 9.01710000  | 7.75560000  | 7.63610000  |
| C | 9.96960000  | 8.35500000  | 8.51770000  |
| H | 10.66460000 | 7.91330000  | 8.95060000  |
| C | 9.69080000  | 9.66160000  | 8.61070000  |
| H | 10.16370000 | 10.28640000 | 9.11120000  |
| C | 8.54230000  | 9.92330000  | 7.80880000  |
| C | 7.88350000  | 11.14220000 | 7.67350000  |
| C | 6.71690000  | 11.39710000 | 6.91870000  |
| C | 6.02500000  | 12.65480000 | 6.82330000  |
| H | 6.25320000  | 13.44590000 | 7.25420000  |
| C | 4.98040000  | 12.46570000 | 5.98640000  |
| H | 4.36980000  | 13.11780000 | 5.72600000  |
| C | 4.96940000  | 11.10840000 | 5.57340000  |
| C | 8.91670000  | 6.38820000  | 7.33300000  |
| C | 8.52110000  | 12.30870000 | 8.40780000  |
| C | 8.01740000  | 12.77470000 | 9.59490000  |
| H | 7.23290000  | 12.40680000 | 9.93090000  |
| C | 8.65440000  | 13.78590000 | 10.30990000 |
| H | 8.31090000  | 14.08200000 | 11.12210000 |



|    |             |             |             |
|----|-------------|-------------|-------------|
| C  | 9.79730000  | 14.33800000 | 9.79300000  |
| C  | 10.29570000 | 13.89230000 | 8.61550000  |
| H  | 11.07430000 | 14.26740000 | 8.27140000  |
| C  | 9.64840000  | 12.87600000 | 7.91630000  |
| H  | 9.99410000  | 12.58340000 | 7.10430000  |
| C  | 9.90300000  | 5.49170000  | 8.02740000  |
| C  | 11.22420000 | 5.46140000  | 7.66510000  |
| H  | 11.51580000 | 5.96620000  | 6.94020000  |
| C  | 12.13590000 | 4.67970000  | 8.37520000  |
| H  | 13.02820000 | 4.64570000  | 8.11560000  |
| C  | 11.70370000 | 3.96220000  | 9.45850000  |
| C  | 10.37920000 | 3.97400000  | 9.82440000  |
| H  | 10.08910000 | 3.47160000  | 10.55110000 |
| C  | 9.48330000  | 4.73880000  | 9.10100000  |
| H  | 8.58530000  | 4.74580000  | 9.34370000  |
| O  | 5.24630000  | 8.29420000  | 7.71100000  |
| O  | 6.35410000  | 7.02970000  | 9.17100000  |
| C  | 5.46310000  | 7.81130000  | 8.88960000  |
| C  | 4.52260000  | 8.32960000  | 9.92100000  |
| C  | 4.53060000  | 7.79780000  | 11.19270000 |
| C  | 3.67230000  | 8.28570000  | 12.19140000 |
| C  | 2.82400000  | 9.27840000  | 11.83390000 |
| C  | 2.76480000  | 9.83210000  | 10.59970000 |
| C  | 3.61090000  | 9.33580000  | 9.63360000  |
| Sn | 19.39600000 | 8.44110000  | 18.11500000 |
| I  | 15.07750000 | 1.03790000  | 13.28910000 |
| I  | 12.78510000 | 14.03580000 | 13.56480000 |
| N  | 17.69770000 | 8.13890000  | 16.94360000 |
| N  | 19.81310000 | 6.38990000  | 17.99910000 |
| O  | 20.61510000 | 8.58790000  | 16.44240000 |
| O  | 19.50730000 | 9.85240000  | 14.98230000 |

|   |             |             |             |
|---|-------------|-------------|-------------|
| C | 16.84430000 | 9.12650000  | 16.51730000 |
| C | 15.89180000 | 8.52710000  | 15.63570000 |
| H | 15.19680000 | 8.96880000  | 15.20270000 |
| C | 16.17060000 | 7.22050000  | 15.54270000 |
| H | 15.69770000 | 6.59570000  | 15.04210000 |
| C | 17.31900000 | 6.95880000  | 16.34460000 |
| C | 17.97790000 | 5.73990000  | 16.47980000 |
| C | 19.14450000 | 5.48500000  | 17.23460000 |
| C | 19.83640000 | 4.22730000  | 17.33000000 |
| H | 19.60820000 | 3.43620000  | 16.89920000 |
| C | 20.88090000 | 4.41640000  | 18.16690000 |
| H | 21.49160000 | 3.76430000  | 18.42730000 |
| C | 20.89200000 | 5.77370000  | 18.58000000 |
| C | 16.94470000 | 10.49390000 | 16.82040000 |
| C | 17.34020000 | 4.57340000  | 15.74560000 |
| C | 17.84400000 | 4.10740000  | 14.55840000 |
| H | 18.62850000 | 4.47530000  | 14.22240000 |
| C | 17.20700000 | 3.09620000  | 13.84350000 |
| H | 17.55050000 | 2.80010000  | 13.03130000 |
| C | 16.06410000 | 2.54410000  | 14.36040000 |
| C | 15.56570000 | 2.98980000  | 15.53790000 |
| H | 14.78710000 | 2.61470000  | 15.88200000 |
| C | 16.21300000 | 4.00610000  | 16.23710000 |
| H | 15.86730000 | 4.29870000  | 17.04900000 |
| C | 15.95840000 | 11.39040000 | 16.12600000 |
| C | 14.63710000 | 11.42070000 | 16.48830000 |
| H | 14.34560000 | 10.91590000 | 17.21320000 |
| C | 13.72550000 | 12.20240000 | 15.77820000 |
| H | 12.83310000 | 12.23640000 | 16.03780000 |
| C | 14.15770000 | 12.91990000 | 14.69490000 |
| C | 15.48220000 | 12.90810000 | 14.32900000 |

|   |             |             |             |
|---|-------------|-------------|-------------|
| H | 15.77230000 | 13.41050000 | 13.60220000 |
| C | 16.37810000 | 12.14330000 | 15.05240000 |
| H | 17.27600000 | 12.13630000 | 14.80970000 |
| C | 20.39830000 | 9.07080000  | 15.26370000 |
| C | 21.33880000 | 8.55250000  | 14.23240000 |
| C | 21.33080000 | 9.08430000  | 12.96070000 |
| C | 22.18910000 | 8.59640000  | 11.96190000 |
| C | 23.03730000 | 7.60370000  | 12.31940000 |
| C | 23.09660000 | 7.05000000  | 13.55370000 |
| C | 22.25050000 | 7.54630000  | 14.51980000 |
| I | 23.71450000 | 15.84420000 | 22.94100000 |
| I | 26.00690000 | 2.84630000  | 22.66530000 |
| N | 21.09440000 | 8.74320000  | 19.28650000 |
| N | 18.97900000 | 10.49220000 | 18.23100000 |
| C | 21.94780000 | 7.75560000  | 19.71280000 |
| C | 22.90030000 | 8.35500000  | 20.59440000 |
| H | 23.59530000 | 7.91330000  | 21.02730000 |
| C | 22.62150000 | 9.66160000  | 20.68730000 |
| H | 23.09440000 | 10.28640000 | 21.18790000 |
| C | 21.47300000 | 9.92330000  | 19.88550000 |
| C | 20.81410000 | 11.14220000 | 19.75020000 |
| C | 19.64760000 | 11.39710000 | 18.99540000 |
| C | 18.95570000 | 12.65480000 | 18.90000000 |
| H | 19.18380000 | 13.44590000 | 19.33090000 |
| C | 17.91110000 | 12.46570000 | 18.06310000 |
| H | 17.30050000 | 13.11780000 | 17.80270000 |
| C | 17.90010000 | 11.10840000 | 17.65010000 |
| C | 21.84740000 | 6.38820000  | 19.40960000 |
| C | 21.45180000 | 12.30870000 | 20.48450000 |
| C | 20.94810000 | 12.77470000 | 21.67160000 |
| H | 20.16360000 | 12.40680000 | 22.00760000 |

|   |             |             |             |
|---|-------------|-------------|-------------|
| C | 21.58500000 | 13.78590000 | 22.38650000 |
| H | 21.24160000 | 14.08200000 | 23.19880000 |
| C | 22.72790000 | 14.33800000 | 21.86970000 |
| C | 23.22640000 | 13.89230000 | 20.69220000 |
| H | 24.00500000 | 14.26740000 | 20.34800000 |
| C | 22.57900000 | 12.87600000 | 19.99290000 |
| H | 22.92470000 | 12.58340000 | 19.18100000 |
| C | 22.83370000 | 5.49170000  | 20.10400000 |
| C | 24.15490000 | 5.46140000  | 19.74170000 |
| H | 24.44650000 | 5.96620000  | 19.01680000 |
| C | 25.06660000 | 4.67970000  | 20.45190000 |
| H | 25.95890000 | 4.64570000  | 20.19230000 |
| C | 24.63440000 | 3.96220000  | 21.53510000 |
| C | 23.30990000 | 3.97400000  | 21.90110000 |
| H | 23.01980000 | 3.47160000  | 22.62780000 |
| C | 22.41390000 | 4.73880000  | 21.17770000 |
| H | 21.51600000 | 4.74580000  | 21.42030000 |
| O | 18.17690000 | 8.29420000  | 19.78760000 |
| O | 19.28480000 | 7.02970000  | 21.24770000 |
| C | 18.39380000 | 7.81130000  | 20.96630000 |
| C | 17.45330000 | 8.32960000  | 21.99770000 |
| C | 17.46130000 | 7.79780000  | 23.26930000 |
| C | 16.60300000 | 8.28570000  | 24.26810000 |
| C | 15.75470000 | 9.27840000  | 23.91060000 |
| C | 15.69550000 | 9.83210000  | 22.67640000 |
| C | 16.54160000 | 9.33580000  | 21.71020000 |
| F | 5.37845137  | 6.78827345  | 11.48339604 |
| F | 3.69319877  | 7.79109587  | 13.44735780 |
| F | 1.90372028  | 10.83516859 | 10.32603025 |
| F | 3.55091055  | 9.83735826  | 8.38166527  |
| F | 9.37978945  | 7.04474174  | 3.69503473  |

|   |             |             |             |
|---|-------------|-------------|-------------|
| F | 11.02699849 | 6.04690955  | 1.75053053  |
| F | 9.23750123  | 9.09100413  | -1.37065780 |
| F | 7.55224863  | 10.09382655 | 0.59330396  |
| F | 18.30913174 | 6.78829682  | 23.56013444 |
| F | 16.62389877 | 7.79109587  | 25.52405780 |
| F | 14.83433417 | 10.83509978 | 22.40274902 |
| F | 16.48160457 | 9.83740831  | 20.45828560 |
| F | 23.95769849 | 6.04690955  | 13.82723053 |
| F | 22.31049543 | 7.04469169  | 15.77171440 |
| F | 20.48294863 | 10.09382655 | 12.67000396 |
| F | 22.16820123 | 9.09100413  | 10.70594220 |
| H | 10.75293697 | 7.19798389  | -0.50732864 |
| H | 2.17766303  | 9.68411611  | 12.58392864 |
| H | 15.10836303 | 9.68411611  | 24.66062864 |
| H | 23.68363697 | 7.19798389  | 11.56937136 |

**Coordinates for dimer model of compound 7**

|    |              |              |              |
|----|--------------|--------------|--------------|
| Sn | 6.439084090  | 8.464790210  | 6.002923200  |
| I  | 2.120584090  | 1.061590210  | 1.177023200  |
| I  | -0.171815910 | 14.059490210 | 1.452723200  |
| N  | 4.740784090  | 8.162590210  | 4.831523200  |
| N  | 6.856184090  | 6.413590210  | 5.887023200  |
| O  | 7.658184090  | 8.611590210  | 4.330323200  |
| O  | 6.550384090  | 9.876090210  | 2.870223200  |
| F  | 10.908784090 | 7.107390210  | -0.753976800 |
| C  | 3.887384090  | 9.150190210  | 4.405223200  |
| C  | 2.934884090  | 8.550790210  | 3.523623200  |
| H  | 2.239884090  | 8.992490210  | 3.090623200  |
| C  | 3.213684090  | 7.244190210  | 3.430623200  |
| H  | 2.740784090  | 6.619390210  | 2.930023200  |
| C  | 4.362184090  | 6.982490210  | 4.232523200  |
| C  | 5.020984090  | 5.763590210  | 4.367823200  |

|   |              |              |              |
|---|--------------|--------------|--------------|
| C | 6.187584090  | 5.508690210  | 5.122523200  |
| C | 6.879484090  | 4.250990210  | 5.218023200  |
| H | 6.651284090  | 3.459890210  | 4.787123200  |
| C | 7.924084090  | 4.440090210  | 6.054923200  |
| H | 8.534684090  | 3.787990210  | 6.315323200  |
| C | 7.935084090  | 5.797390210  | 6.467923200  |
| C | 3.987784090  | 10.517590210 | 4.708323200  |
| C | 4.383284090  | 4.597090210  | 3.633523200  |
| C | 4.887084090  | 4.131090210  | 2.446423200  |
| H | 5.671584090  | 4.498990210  | 2.110423200  |
| C | 4.250084090  | 3.119890210  | 1.731423200  |
| H | 4.593584090  | 2.823790210  | 0.919223200  |
| C | 3.107184090  | 2.567790210  | 2.248323200  |
| C | 2.608784090  | 3.013490210  | 3.425823200  |
| H | 1.830184090  | 2.638390210  | 3.769923200  |
| C | 3.256084090  | 4.029790210  | 4.125023200  |
| H | 2.910384090  | 4.322390210  | 4.936923200  |
| C | 3.001484090  | 11.414090210 | 4.013923200  |
| C | 1.680184090  | 11.444390210 | 4.376223200  |
| H | 1.388684090  | 10.939590210 | 5.101123200  |
| C | 0.768584090  | 12.226090210 | 3.666123200  |
| H | -0.123715910 | 12.260090210 | 3.925723200  |
| C | 1.200784090  | 12.943590210 | 2.582823200  |
| C | 2.525284090  | 12.931790210 | 2.216923200  |
| H | 2.815384090  | 13.434190210 | 1.490223200  |
| C | 3.421184090  | 12.166990210 | 2.940323200  |
| H | 4.319084090  | 12.159990210 | 2.697623200  |
| C | 7.441384090  | 9.094490210  | 3.151623200  |
| C | 8.381884090  | 8.576190210  | 2.120323200  |
| C | 8.373884090  | 9.107990210  | 0.848623200  |
| C | 9.232184090  | 8.620090210  | -0.150076800 |

|   |              |              |              |
|---|--------------|--------------|--------------|
| C | 10.080384090 | 7.627390210  | 0.207323200  |
| C | 10.139684090 | 7.073690210  | 1.441623200  |
| C | 9.293584090  | 7.569990210  | 2.407723200  |
| I | 10.757584090 | 15.867890210 | 10.828923200 |
| I | 13.050084090 | 2.869990210  | 10.553223200 |
| N | 8.137484090  | 8.766890210  | 7.174423200  |
| N | 6.022084090  | 10.515890210 | 6.118923200  |
| C | 8.990884090  | 7.779290210  | 7.600723200  |
| C | 9.943384090  | 8.378690210  | 8.482323200  |
| H | 10.638384090 | 7.936990210  | 8.915223200  |
| C | 9.664584090  | 9.685290210  | 8.575323200  |
| H | 10.137484090 | 10.310090210 | 9.075823200  |
| C | 8.516084090  | 9.946990210  | 7.773423200  |
| C | 7.857284090  | 11.165890210 | 7.638123200  |
| C | 6.690684090  | 11.420790210 | 6.883323200  |
| C | 5.998784090  | 12.678490210 | 6.787923200  |
| H | 6.226984090  | 13.469590210 | 7.218823200  |
| C | 4.954184090  | 12.489390210 | 5.951023200  |
| H | 4.343584090  | 13.141490210 | 5.690623200  |
| C | 4.943184090  | 11.132090210 | 5.538023200  |
| C | 8.890484090  | 6.411890210  | 7.297623200  |
| C | 8.494884090  | 12.332390210 | 8.372423200  |
| C | 7.991184090  | 12.798390210 | 9.559523200  |
| H | 7.206684090  | 12.430490210 | 9.895523200  |
| C | 8.628184090  | 13.809590210 | 10.274523200 |
| H | 8.284684090  | 14.105690210 | 11.086723200 |
| C | 9.771084090  | 14.361690210 | 9.757623200  |
| C | 10.269484090 | 13.915990210 | 8.580123200  |
| H | 11.048084090 | 14.291090210 | 8.236023200  |
| C | 9.622184090  | 12.899690210 | 7.880923200  |
| H | 9.967884090  | 12.607090210 | 7.068923200  |

|    |               |              |               |
|----|---------------|--------------|---------------|
| C  | 9.876784090   | 5.515390210  | 7.992023200   |
| C  | 11.197984090  | 5.485090210  | 7.629723200   |
| H  | 11.489584090  | 5.989890210  | 6.904823200   |
| C  | 12.109684090  | 4.703390210  | 8.339823200   |
| H  | 13.001984090  | 4.669390210  | 8.080223200   |
| C  | 11.677484090  | 3.985890210  | 9.423123200   |
| C  | 10.352984090  | 3.997690210  | 9.789023200   |
| H  | 10.062884090  | 3.495290210  | 10.515723200  |
| C  | 9.457084090   | 4.762490210  | 9.065623200   |
| H  | 8.559084090   | 4.769490210  | 9.308323200   |
| O  | 5.220084090   | 8.317890210  | 7.675623200   |
| O  | 6.327884090   | 7.053390210  | 9.135623200   |
| F  | 1.969384090   | 9.822090210  | 12.759823200  |
| C  | 5.436884090   | 7.834990210  | 8.854223200   |
| C  | 4.496384090   | 8.353290210  | 9.885623200   |
| C  | 4.504384090   | 7.821490210  | 11.157323200  |
| C  | 3.646084090   | 8.309390210  | 12.156023200  |
| C  | 2.797784090   | 9.302090210  | 11.798523200  |
| C  | 2.738584090   | 9.855790210  | 10.564323200  |
| C  | 3.584684090   | 9.359490210  | 9.598223200   |
| Sn | -6.439084090  | 8.417409790  | -6.002923200  |
| I  | -10.757584090 | 1.014209790  | -10.828923200 |
| I  | -13.050084090 | 14.012109790 | -10.553223200 |
| N  | -8.137484090  | 8.115209790  | -7.174423200  |
| N  | -6.022084090  | 6.366209790  | -6.118923200  |
| O  | -5.220084090  | 8.564209790  | -7.675623200  |
| O  | -6.327884090  | 9.828709790  | -9.135623200  |
| F  | -1.969384090  | 7.060009790  | -12.759823200 |
| C  | -8.990884090  | 9.102809790  | -7.600723200  |
| C  | -9.943384090  | 8.503409790  | -8.482323200  |
| H  | -10.638384090 | 8.945109790  | -8.915223200  |



|   |               |              |               |
|---|---------------|--------------|---------------|
| C | -9.664584090  | 7.196809790  | -8.575323200  |
| H | -10.137484090 | 6.572009790  | -9.075823200  |
| C | -8.516084090  | 6.935109790  | -7.773423200  |
| C | -7.857284090  | 5.716209790  | -7.638123200  |
| C | -6.690684090  | 5.461309790  | -6.883323200  |
| C | -5.998784090  | 4.203609790  | -6.787923200  |
| H | -6.226984090  | 3.412509790  | -7.218823200  |
| C | -4.954184090  | 4.392709790  | -5.951023200  |
| H | -4.343584090  | 3.740609790  | -5.690623200  |
| C | -4.943184090  | 5.750009790  | -5.538023200  |
| C | -8.890484090  | 10.470209790 | -7.297623200  |
| C | -8.494884090  | 4.549709790  | -8.372423200  |
| C | -7.991184090  | 4.083709790  | -9.559523200  |
| H | -7.206684090  | 4.451609790  | -9.895523200  |
| C | -8.628184090  | 3.072509790  | -10.274523200 |
| H | -8.284684090  | 2.776409790  | -11.086723200 |
| C | -9.771084090  | 2.520409790  | -9.757623200  |
| C | -10.269484090 | 2.966109790  | -8.580123200  |
| H | -11.048084090 | 2.591009790  | -8.236023200  |
| C | -9.622184090  | 3.982409790  | -7.880923200  |
| H | -9.967884090  | 4.275009790  | -7.068923200  |
| C | -9.876784090  | 11.366709790 | -7.992023200  |
| C | -11.197984090 | 11.397009790 | -7.629723200  |
| H | -11.489584090 | 10.892209790 | -6.904823200  |
| C | -12.109684090 | 12.178709790 | -8.339823200  |
| H | -13.001984090 | 12.212709790 | -8.080223200  |
| C | -11.677484090 | 12.896209790 | -9.423123200  |
| C | -10.352984090 | 12.884409790 | -9.789023200  |
| H | -10.062884090 | 13.386809790 | -10.515723200 |
| C | -9.457084090  | 12.119609790 | -9.065623200  |
| H | -8.559084090  | 12.112609790 | -9.308323200  |

|   |              |              |               |
|---|--------------|--------------|---------------|
| C | -5.436884090 | 9.047109790  | -8.854223200  |
| C | -4.496384090 | 8.528809790  | -9.885623200  |
| C | -4.504384090 | 9.060609790  | -11.157323200 |
| C | -3.646084090 | 8.572709790  | -12.156023200 |
| C | -2.797784090 | 7.580009790  | -11.798523200 |
| C | -2.738584090 | 7.026309790  | -10.564323200 |
| C | -3.584684090 | 7.522609790  | -9.598223200  |
| I | -2.120584090 | 15.820509790 | -1.177023200  |
| I | 0.171815910  | 2.822609790  | -1.452723200  |
| N | -4.740784090 | 8.719509790  | -4.831523200  |
| N | -6.856184090 | 10.468509790 | -5.887023200  |
| C | -3.887384090 | 7.731909790  | -4.405223200  |
| C | -2.934884090 | 8.331309790  | -3.523623200  |
| H | -2.239884090 | 7.889609790  | -3.090623200  |
| C | -3.213684090 | 9.637909790  | -3.430623200  |
| H | -2.740784090 | 10.262709790 | -2.930023200  |
| C | -4.362184090 | 9.899609790  | -4.232523200  |
| C | -5.020984090 | 11.118509790 | -4.367823200  |
| C | -6.187584090 | 11.373409790 | -5.122523200  |
| C | -6.879484090 | 12.631109790 | -5.218023200  |
| H | -6.651284090 | 13.422209790 | -4.787123200  |
| C | -7.924084090 | 12.442009790 | -6.054923200  |
| H | -8.534684090 | 13.094109790 | -6.315323200  |
| C | -7.935084090 | 11.084709790 | -6.467923200  |
| C | -3.987784090 | 6.364509790  | -4.708323200  |
| C | -4.383284090 | 12.285009790 | -3.633523200  |
| C | -4.887084090 | 12.751009790 | -2.446423200  |
| H | -5.671584090 | 12.383109790 | -2.110423200  |
| C | -4.250084090 | 13.762209790 | -1.731423200  |
| H | -4.593584090 | 14.058309790 | -0.919223200  |
| C | -3.107184090 | 14.314309790 | -2.248323200  |

|   |               |              |               |
|---|---------------|--------------|---------------|
| C | -2.608784090  | 13.868609790 | -3.425823200  |
| H | -1.830184090  | 14.243709790 | -3.769923200  |
| C | -3.256084090  | 12.852309790 | -4.125023200  |
| H | -2.910384090  | 12.559709790 | -4.936923200  |
| C | -3.001484090  | 5.468009790  | -4.013923200  |
| C | -1.680184090  | 5.437709790  | -4.376223200  |
| H | -1.388684090  | 5.942509790  | -5.101123200  |
| C | -0.768584090  | 4.656009790  | -3.666123200  |
| H | 0.123715910   | 4.622009790  | -3.925723200  |
| C | -1.200784090  | 3.938509790  | -2.582823200  |
| C | -2.525284090  | 3.950309790  | -2.216923200  |
| H | -2.815384090  | 3.447909790  | -1.490223200  |
| C | -3.421184090  | 4.715109790  | -2.940323200  |
| H | -4.319084090  | 4.722109790  | -2.697623200  |
| O | -7.658184090  | 8.270509790  | -4.330323200  |
| O | -6.550384090  | 7.006009790  | -2.870223200  |
| F | -10.908784090 | 9.774709790  | 0.753976800   |
| C | -7.441384090  | 7.787609790  | -3.151623200  |
| C | -8.381884090  | 8.305909790  | -2.120323200  |
| C | -8.373884090  | 7.774109790  | -0.848623200  |
| C | -9.232184090  | 8.262009790  | 0.150076800   |
| C | -10.080384090 | 9.254709790  | -0.207323200  |
| C | -10.139684090 | 9.808409790  | -1.441623200  |
| C | -9.293584090  | 9.312109790  | -2.407723200  |
| F | -7.526032720  | 6.764583240  | -0.557927160  |
| F | -9.211285320  | 7.767405660  | 1.406034600   |
| F | -9.353573540  | 9.813668050  | -3.659657930  |
| F | -11.000782580 | 10.811500240 | -1.715153730  |
| F | -3.524694640  | 7.021051530  | -8.346288470  |
| F | -1.877504370  | 6.023241200  | -10.290653450 |
| F | -5.352235460  | 10.070136340 | -11.448019240 |

|   |              |              |               |
|---|--------------|--------------|---------------|
| F | -3.666982860 | 9.067313920  | -13.411981000 |
| F | 9.353573540  | 7.068431950  | 3.659657930   |
| F | 11.000782580 | 6.070599760  | 1.715153730   |
| F | 7.526032720  | 10.117516760 | 0.557927160   |
| F | 9.211285320  | 9.114694340  | -1.406034600  |
| F | 5.352235460  | 6.811963660  | 11.448019240  |
| F | 3.666982860  | 7.814786080  | 13.411981000  |
| F | 1.877504370  | 10.858858800 | 10.290653450  |
| F | 3.524694640  | 9.861048470  | 8.346288470   |

### References:

1. Adler, A. D.; Longo, F. R.; Finarelli, J. D.; Goldmacher, J.; Assour, J.; Korsakoff, L. *J. Org. Chem.* **1967**, *32*, 476.
2. Patra, R.; Titi, H. M.; Goldberg, I. *Cryst. Growth Des.* **2013**, *13*, 1342.
3. Sheldrick GM. SHELXS version-**2018/3** and SHELXL version-**2018/3**: programs for crystal structure solution and refinement. University of Gottingen, Germany, **2018**.
4. L. J. Farrugia, *J. Appl. Crystallogr.*, **1999**, *32*, 837-838.
5. Becke, A. D. *J. Chem. Phys.* **1993**, *98*, 5648.
6. Lee, C.; Yang, W.; Parr, R. G. *Phys. Rev. B* **1988**, *37*, 785.
7. K. Raghavachari, J. S. Binkley, R. Seeger and J. A. Pople, *J. Chem. Phys.*, **1980**, *72*, 650.
8. Gaussian 09, Revision A.1, Frisch, M. J.; Trucks, G. W.; Schlegel, H. B.; Scuseria, G. E.; Robb, M. A.; Cheeseman, J. R.; Scalmani, G.; Barone, V.; Mennucci, B.; Petersson, G. A.; Nakatsuji, H.; Caricato, M.; Li, X.; Hratchian, H. P.; Izmaylov, A.F.; Bloino, J.; Zheng, G.; Sonnenberg, J. L.; Hada, M.; Ehara, M.; Toyota, K.; Fukuda, R.; Hasegawa, J.; Ishida, M.; Nakajima, T.; Honda, Y.; Kitao, O.; Nakai, H.; Vreven, T.; Montgomery, J. A.; Peralta, J.E.; Ogliaro, F.; Bearpark, M.; Heyd, J. J.; Brothers, E.; Kudin, K.N.; Staroverov, V. N.; Kobayashi, R.; Normand, J.; Raghavachari, K.; Rendell, A.; Burant, J. C.; Iyengar, S.S.; Tomasi, J.; Cossi, M.; Rega, N.; Millam, J. M.; Klene, M.; Knox, J. E.; Cross, J. B.; Bakken, V.; Adamo, C.; Jaramillo, J.; Gomperts, R.; Stratmann, R. E.; Yazyev, O.; Austin, A. J.; Cammi, R.; Pomelli, C.; Ochterski, J. W.; Martin, R. L.; Morokuma, K.; Zakrzewski, V.G.; Voth, G. A.; Salvador, P.; Dannenberg, J.J.; Dapprich, S.; Daniels, A. D.; Farkas, O.; Foresman, J. B.; Ortiz, J. V.; Cioslowski, J.; Fox, D. J. Gaussian, Inc., Wallingford CT, (**2009**).

9. B. A. Shainyan , N. N. Chipanina, T. N. Aksamentova, L. P. Oznobikhina, G. N. Rosentsveig, I. B. Rosentsveig, *Tetrahedron*, **2010**, *66*, 8551e8556
